# 1 A versatile high-throughput assay 2 based on 3D ring-shaped cardiac 3 tissues generated from human 4 induced pluripotent stem cell 5 derived cardiomyocytes

6 Magali Seguret<sup>1</sup>, Patricia Davidson<sup>2</sup>, Stijn Robben<sup>2</sup>, Charlène Jouve<sup>1</sup>, Céline  
7 Pereira<sup>1</sup>, Cyril Cerveau<sup>2</sup>, Maël Le Berre<sup>2</sup>, Rita S. Rodrigues Ribeiro<sup>2\*</sup>,  
8 Jean-Sébastien Hulot<sup>1\*</sup>

**\*For correspondence:**

9 [jean-sebastien.hulot@inserm.fr](mailto:jean-sebastien.hulot@inserm.fr)  
(FMS); [ana-rita.ribeiro@4dcell.com](mailto:ana-rita.ribeiro@4dcell.com)  
(FS)

9 <sup>1</sup> Université de Paris Cité, PARCC, INSERM, F-75015 Paris, France; <sup>2</sup>4DCell, Montreuil,  
10 France

11 **Present address:** <sup>§</sup>Paris  
Cardiovascular Research Center,  
56 Rue Leblanc, Paris, France

12 **Abstract** We developed a 96-well plate assay which allows fast, reproducible and  
13 high-throughput generation of 3D cardiac rings around a deformable optically transparent  
14 hydrogel (PEG) pillar of known stiffness. Human induced pluripotent stem cell-derived  
15 cardiomyocytes, mixed with normal human adult dermal fibroblasts in an optimized 3:1 ratio,  
16 self-organized to form ring-shaped cardiac constructs. Immunostaining showed that the  
17 fibroblasts form a basal layer in contact with the glass, stabilizing the muscular fiber above.  
18 Tissues started contracting around the pillar at D1 and their fractional shortening increased until  
19 D7, reaching a plateau at  $25 \pm 1\%$ , that was maintained up to 14 days. The average stress,  
20 calculated from the compaction of the central pillar during contractions, was  $1.4 \pm 0.4$  mN/mm<sup>2</sup>.  
21 The cardiac constructs recapitulated expected inotropic responses to calcium and various drugs  
22 (isoproterenol, verapamil) as well as the arrhythmogenic effects of dofetilide. This versatile  
23 high-throughput assay allows multiple in situ mechanical and structural read-outs.

## 25 Introduction

26 Cardiac tissue engineering (CTE) aims to generate *in vitro* cell constructs that recapitulate the intri-  
27 cate structural and functional properties of the native myocardium (*van der Velden et al., 2022*). As  
28 the heart lacks regenerative capacities, CTE emerged in the field of regenerative medicine with the  
29 objective of producing cardiac grafts that can be implanted in patients with heart failure (*Madonna*  
30 *et al., 2019; Jabbour et al., 2021; Eschenhagen et al., 2022*). In parallel, the rapid development of  
31 biomaterials and microfabrication techniques, combined with progress in pluripotent stem cell  
32 biology have enabled the generation of miniature engineered heart tissues (EHTs) used as “hearts-  
33 on-chips” or cardiac organoids models. While these EHTs recapitulate a limited number of func-  
34 tions *in vitro*, they have provided essential platforms for cardiac disease modeling (*Filippo Buono*  
35 *et al. (2020); Cashman et al. (2016); Williams et al. (2021); Stillitano et al. (2016); Bliley et al. (2021);*  
36 *Goldfracht et al. (2019); Richards et al. (2020)*) and drug development (*Beauchamp et al. (2015);*  
37 *Polonchuk et al. (2017); Zhao et al. (2019); Mannhardt et al. (2020)*), reducing the need for animal  
38 studies.

39 Different combinations of cells, biomaterials, and scaffolds have successfully generated 3D  
40 EHTs (*Seguret et al. (2021); Zhuang et al. (2022)*) with various geometries including spheroids

41 (*Beauchamp et al. (2015)*; *Polonchuk et al. (2017)*; *Giacomelli et al. (2020)*; *Richards et al. (2020)*;  
42 *Hofbauer et al. (2021)*; *Lewis-Israeli et al. (2021)*), cardiac strips (*Hansen et al. (2010)*; *Legant et al.*  
43 *(2009)*; *Turnbull et al. (2014)*; *Mannhardt et al. (2016)*; *Nunes et al. (2013)*; *Zhao et al. (2019)*),  
44 circular bundles (*Goldfracht et al. (2020)*; *Tiburcy et al. (2017)*; *Li et al. (2020)*), myocardium-like  
45 sheets (*Shadrin et al. (2017)*) or ventricle-like chambers (*MacQueen et al. (2018)*; *Li et al. (2018)*;  
46 *Lee et al. (2019)*). The EHTs are optimally formed by mixing human-induced pluripotent stem cells  
47 (hiPSC)-derived cardiomyocytes, fibroblasts, and/or other cell types such as endothelial cells to  
48 more closely mimic the structure and cellular complexity of native myocardium (*Giacomelli et al.*  
49 *(2020)*; *Saini et al. (2015)*). However, a major obstacle in the development of EHTs is the inevitable  
50 trade-off between the need for miniaturization to increase throughput (i.e. several organoids in  
51 each well of a 96- or 384-well plate) and the biological complexity of the tissues (*Cho et al. (2022)*).  
52 The first EHTs were generated in small batches, using pre-designed molds, and having a millimet-  
53 ric size (*Boudou et al. (2012)*; *Turnbull et al. (2014)*; *Legant et al. (2009)*; *Mannhardt et al. (2016)*).  
54 Since then, two different avenues of development have emerged. On the one hand, to optimize  
55 throughput, more straightforward, low complexity assays such as spheroids were developed to  
56 obtain smaller tissues (*Beauchamp et al., 2015*; *Polonchuk et al., 2017*). These multicellular con-  
57 structs are valuable models to study drug responses and the human heart micro-environment but  
58 they lack the geometric intricacy of a native cardiac tissue. On the other hand, the search for higher  
59 tissue complexity and maturity led to the development of chambered organoids (*MacQueen et al.*  
60 *(2018)*; *Li et al. (2018)*; *Lee et al. (2019)*). These constructs require the use of complex techniques  
61 such as bioprinting or the use of bioreactors, and tissues are generated one at a time, making these  
62 approaches time-consuming and impractical on a large scale. Therefore, the next step in tissue en-  
63 gineering needs to be directed towards high-throughput physiologically-relevant assays that are  
64 simple and straightforward for the end-user. Scaling down the tissue size to increase throughput,  
65 while controlling their geometry represents a major engineering challenge. Moreover in actual de-  
66 signs, many EHTs are attached on static posts that can impact tissue formation, result in isometric  
67 contraction and can interfere with optical acquisitions when made with opaque material.

68 Here, we report the development of a novel assay which allows fast, reproducible and high-  
69 throughput generation of 3D cardiac rings in a 96-well plate using hiPSC-derived cardiomyocytes.  
70 The design allows the formation of multiple ring-shaped cardiac tissues in a well. The EHTs form  
71 around a central pillar made from an optically-transparent and deformable polymer that enables  
72 *in situ* monitoring of the tissue contraction with simultaneous measurements of force generation.

## 73 Results

### 74 Design and characterization of the molds

75 3D steel molds were designed to obtain a structure on which cells can be directed to ring-shaped  
76 cavities during sedimentation (Figure 1A). The mold fits in the well of a 96-well plate, and consists  
77 of 21 identical conical structures with a central hole (Figure 1A left). The molds obtained from  
78 the manufacturer were imaged by scanning electron microscopy and found to correspond to the  
79 intended design (Figure 1A, right). Casts of the mold were created in PEG to check the shape of the  
80 inner cavities of the mold, but the resulting structures were too soft to maintain their shape in air,  
81 and were transparent in water and therefore could not be imaged. More rigid polydimethylsiloxane  
82 (PDMS) was cast from the mold to verify the shape of the resulting structures (Figure 1B). These  
83 showed that the interior profile of the cavity was shaped in a reversed hourglass, as expected.

### 84 Generation and characterization of the gels

85 3D gel structures were obtained by adding a drop of PEG gel solution on top of the molds, in-  
86 verting these onto a glass coverslip, polymerizing the gel and attaching the resulting sample on a  
87 96-well plate. To determine the stiffness of the gels, a sample of the aqueous PEG solution was  
88 polymerized. A capillary was placed perpendicularly to the edge of the gel and negative pressure  
89 was applied to the gel through the capillary. The deformation of the gel into the capillary was mea-  
90 sured and used to determine the Young's modulus of the gel (Figure 1 supplement 1). The values  
91 obtained ( $11.4 \pm 0.5$  kPa) are within the physiological range for human cardiac tissue (*Gershlak*

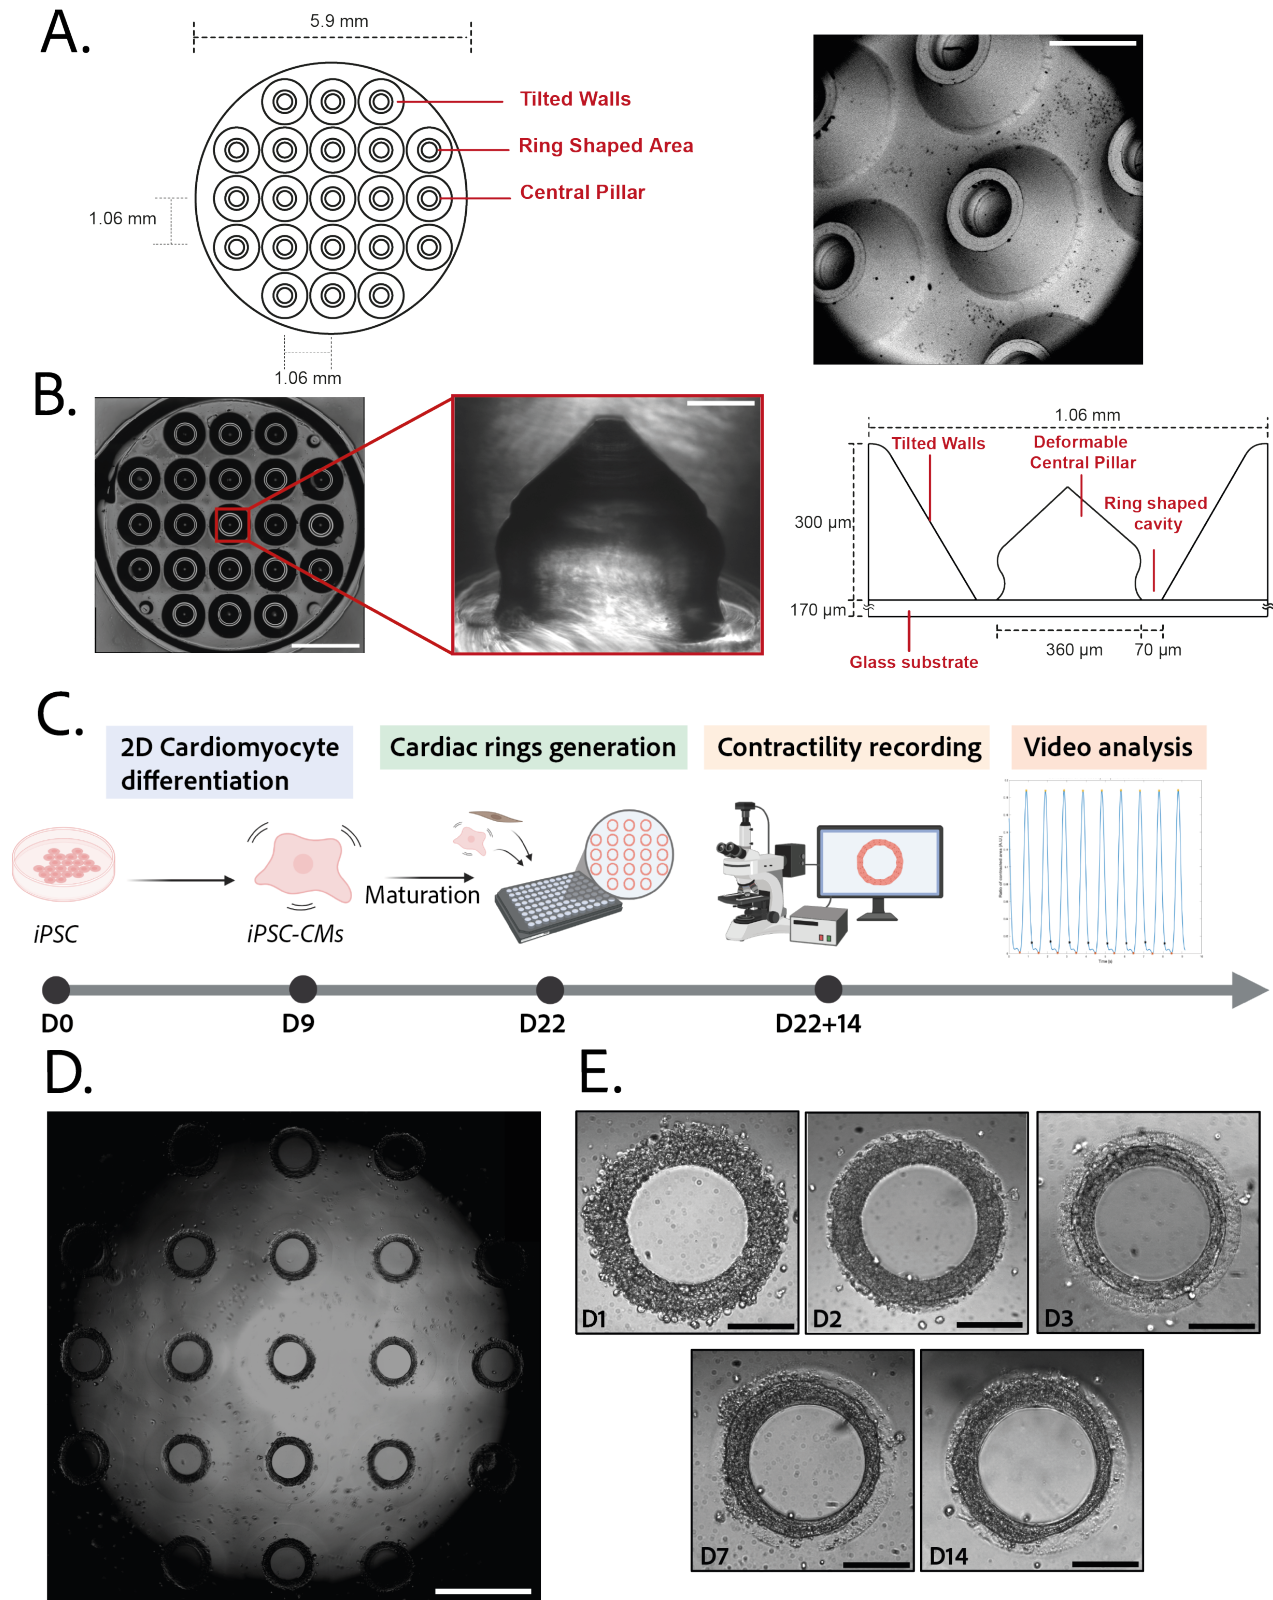

**Figure 1.** Description of the mold and seeding procedure. **A.** Micromachined stainless steel mold used to shape the gel – Design (left) and scanning electron microscopy image (right) of the mold – Scale bar: 500  $\mu\text{m}$ . **B.** Molded PEG gel (left - scale bar 2 mm) and zoomed view of a pillar from its PDMS replica (middle- scale bar 100  $\mu\text{m}$ ). Design and size of the pillar (right). **C.** Timeline of the seeding procedure. **D.** Cardiac rings in a well one day after seeding. Images stitched with ImageJ plugin - Scale bar: 1 mm. **E.** Representative compaction of a ring with time after seeding (from day 0 to day 14), in brightfield - Scale bars: 200  $\mu\text{m}$ .

**Figure 1—figure supplement 1.** Measurement of the Young's Modulus of PEG gel

**Figure 1—figure supplement 2.** Measurement of the efficiency of differentiation the the iPSCs into cardiomyocytes.

**Figure 1—video 1.** Multiple rings beating at D14 - Brightfield imaging x4 magnification.

92 *et al. (2013)*).

### 93 **Generation of ring-shaped cardiac tissues**

94 The efficiency of the differentiation of iPSCs into cardiomyocytes was in average of  $96.9 \pm 0.8\%$  (Fig-  
95 ure 1 Supplement 2). Cardiomyocytes derived from iPSCs (iPSC-CMs) with fibroblasts were seeded  
96 on the gels. After centrifugation, the cells sedimented into the ring-shaped cavities (Figure 1D),  
97 and compacted around the pillars to rapidly form ring-shaped cardiac constructs (Figure 1D-E).  
98 Initial tests with cardiomyocytes resulted in cell cluster formation and malformation of the rings  
99 (Figure 2A). To stabilize the tissues, iPSC-CMs were mixed with fibroblasts and different ratios of  
100 hiPSC-CMs to fibroblasts were tested in order to obtain the highest number of full stable cardiac  
101 rings with time. Three ratios of hiPSC-CMs: fibroblasts were tested (Figure 2B) based on previous  
102 reports (*Tiburcy et al. (2017)*; *Saini et al. (2015)*; *Giacomelli et al. (2020)*; *Beauchamp et al. (2020)*).  
103 The 3:1 hiPSC-CMs: fibroblasts ratio was determined to be optimal and was used for all of the fol-  
104 lowing experiments. Tissues started beating within 24 hours after seeding (Video 1). The rings  
105 compacted in time as shown in Figure 1E. In these optimization experiments, we obtained an av-  
106 erage of  $10.75 \pm 0.48$  tissues per well which were stable over time for at least 20 days with the 3:1  
107 hiPSC-CMs: fibroblasts ratio.

### 108 **Structure and organization of the engineered cardiac tissues**

109 The 3D organization of the tissues was assessed by 3D immunofluorescence imaging 14 days after  
110 seeding. The fibroblasts are concentrated at the base of the ring in contact with the glass (Figure 2C  
111 – bottom panel), whereas the cardiomyocytes form a compact ring above the fibroblasts around  
112 the central pillar (Figure 2C – top panel). Troponin T staining evidenced the formation of striated  
113 elongated fibers (Figure 2D), which are typical of cardiac tissue. The obtained cardiac tissues are  
114  $75.5 \pm 1.8 \mu\text{m}$  high and their shape is toric, as shown in the 3D reconstruction (Figure 2E and video  
115 1).

### 116 **Contractility analysis**

117 Tissues started contracting less than 24 hours after seeding, which was visible through the defor-  
118 mation of their central pillar (Supplemental video 1). Each tissue was recorded in brightfield imag-  
119 ing, at a 10X magnification with a high-speed camera (Supplemental video 1). An in-house Matlab  
120 code was developed to quantify the contraction and relaxation phases of the tissues by monitor-  
121 ing the area of the central pillar over time (Figure 3A). The beat rate of the tissues first decreased  
122 between day 1 and day 3 and increased again to reach  $0.58 \pm 0.030$  Hz on day 14 (Figure 3B). The  
123 contraction stress developed by the tissues increased from day 1 until day 7 (Figure 3C). At day 7,  
124 the contractility parameters stabilized with an average stress of  $1.4 \pm 0.1$  mN/mm<sup>2</sup> (Figure 3C.). The  
125 corresponding developed strain  $\epsilon_A$  was of  $24.84 \pm 0.92\%$  (Figure 3 supplement 1). Consistently, the  
126 relaxation and contraction speeds also increased during the first 7 days, then reaching a plateau  
127 (Figure 3D and E).

### 128 **Physiological testing on the engineered cardiac tissues**

129 The response in contractility of the cardiac rings to an increase in the extracellular calcium concen-  
130 tration was assessed by sequential addition of calcium in the medium, starting from a concentra-  
131 tion of 0.5 mM up to 3.5 mM (Figure 4A). The changes in the contraction stress and the contraction  
132 and relaxation speeds with calcium concentration were significant ( $p < 0.0001$  for each parameter,  
133 non significant for the beat rate). We observed a stabilization of the beat rate around 0.5 Hz at  
134 2 mM and a positive inotropic response as the contraction amplitude increased by 600 % with a  
135 corresponding  $EC_{50}$  of 1.346 mM with a confidence interval (CI) of [1.159; 1.535] mM.

### 136 **Pharmacological testing on the engineered cardiac tissues**

137 We next evaluated the dose-response to increasing concentrations of several cardiotropic drugs.  
138 The changes in the beating parameters with verapamil concentration were found to be signifi-  
139 cant ( $p = 0.0053$  for the beat rate and  $p < 0.0001$  for the other parameters). The addition of ve-  
140 rapamil, an L-type calcium channel inhibitor, induced a negative inotropic effect until the com-



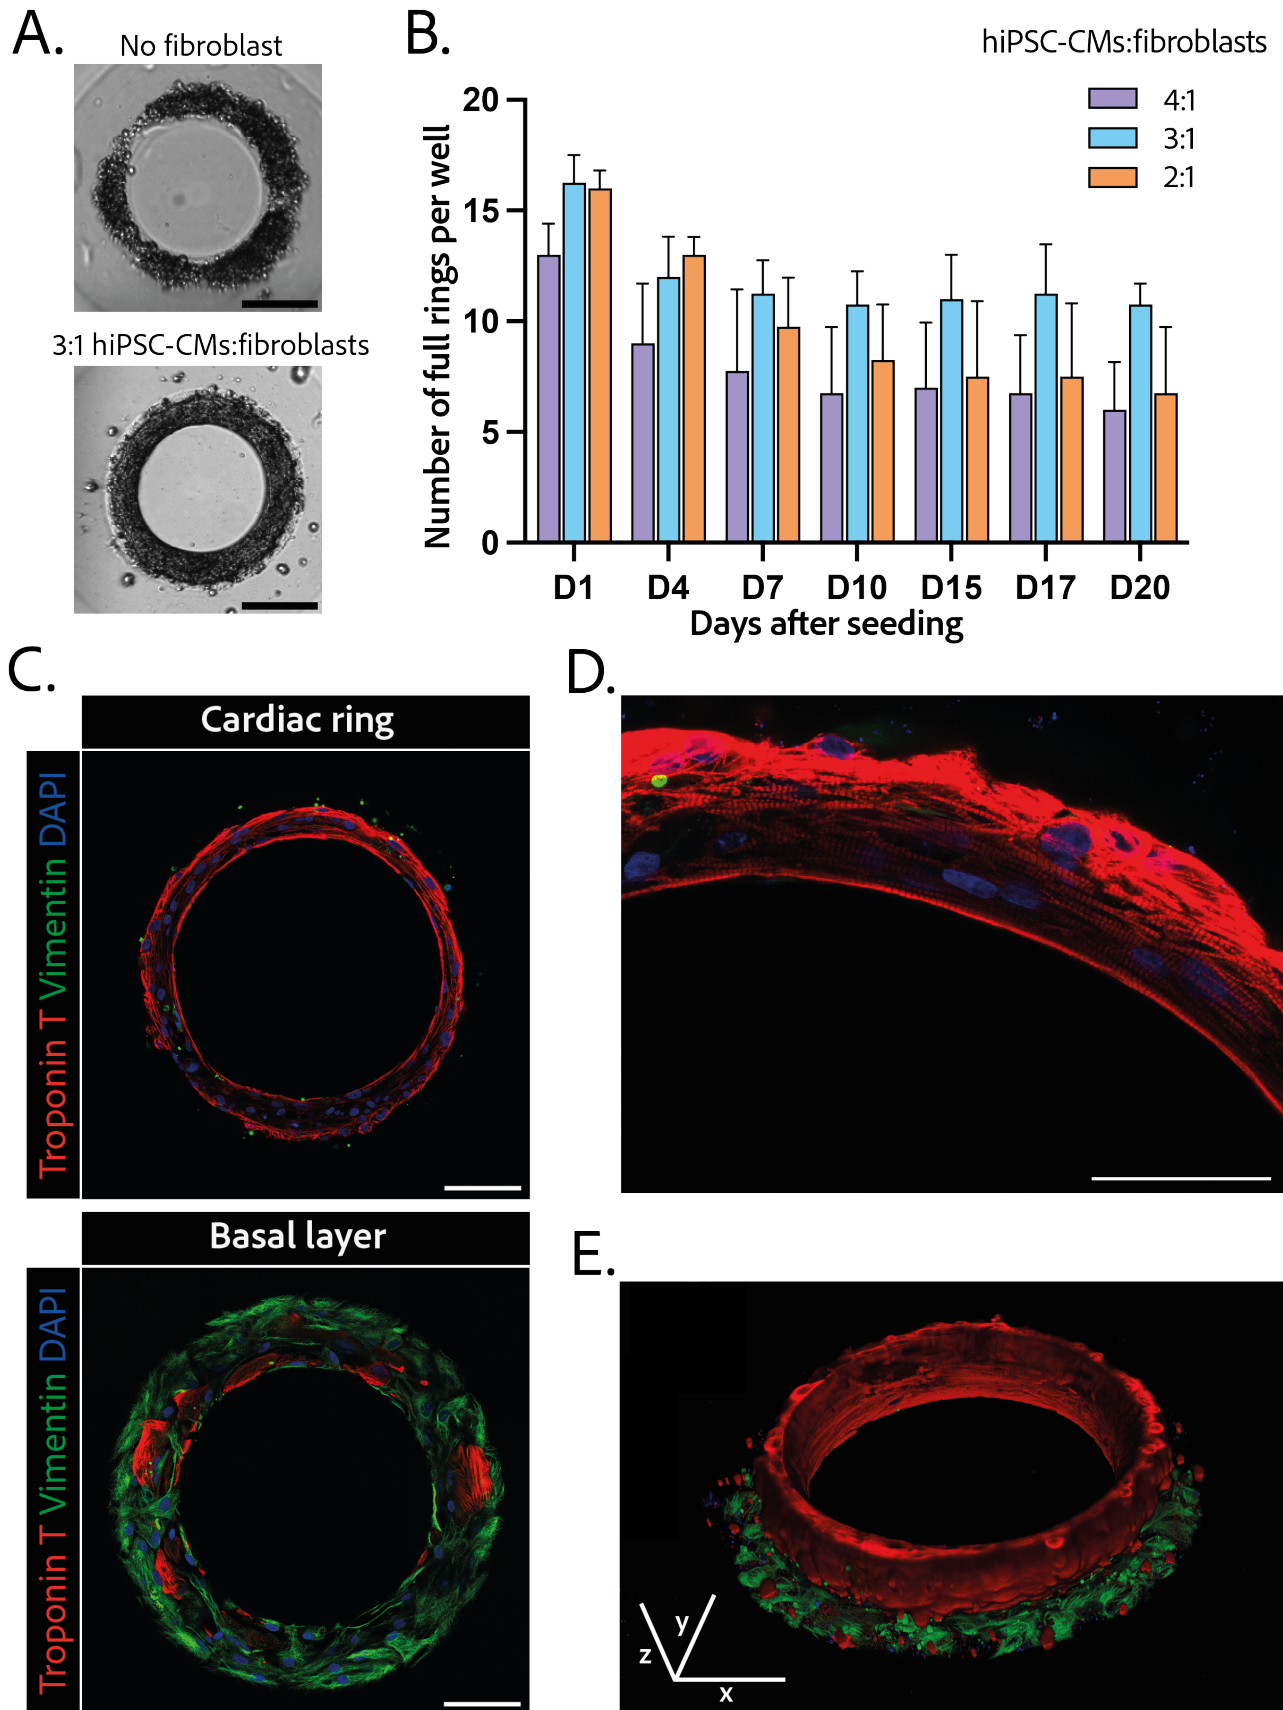

**Figure 2.** Composition and structure of the cardiac rings. **A.** Example brightfield images of cardiomyocytes seeded with or without fibroblasts one day after seeding - Scale bar : 200  $\mu$ m. **B.** Number of full cardiac rings per well in time according to the hiPSC-CMs:fibroblasts ratio they contain (4:1, 3:1 or 2:1). **C.** Confocal imaging of immunostained tissues at different heights: cardiac ring (top panel), and basal layer (bottom panel) of a tissue at 40X magnification. Vimentin, stained in green, corresponds to fibroblasts, troponin T, in red, is specific to cardiomyocytes, and DAPI is in blue. Scale bars: 100  $\mu$ m. **D.** Picture of the immunostained contractile fibers at 63X magnification. Vimentin (green), Troponin T (red) and DAPI (blue) - Scale bar: 50 $\mu$ m. **E.** 3D reconstruction of a ring, x, y and z scale bars : 100  $\mu$ m.

**Figure 2—figure supplement 1.** Larger scale pictures of panel C.

**Figure 2—video 1.** 3D reconstruction of a ring

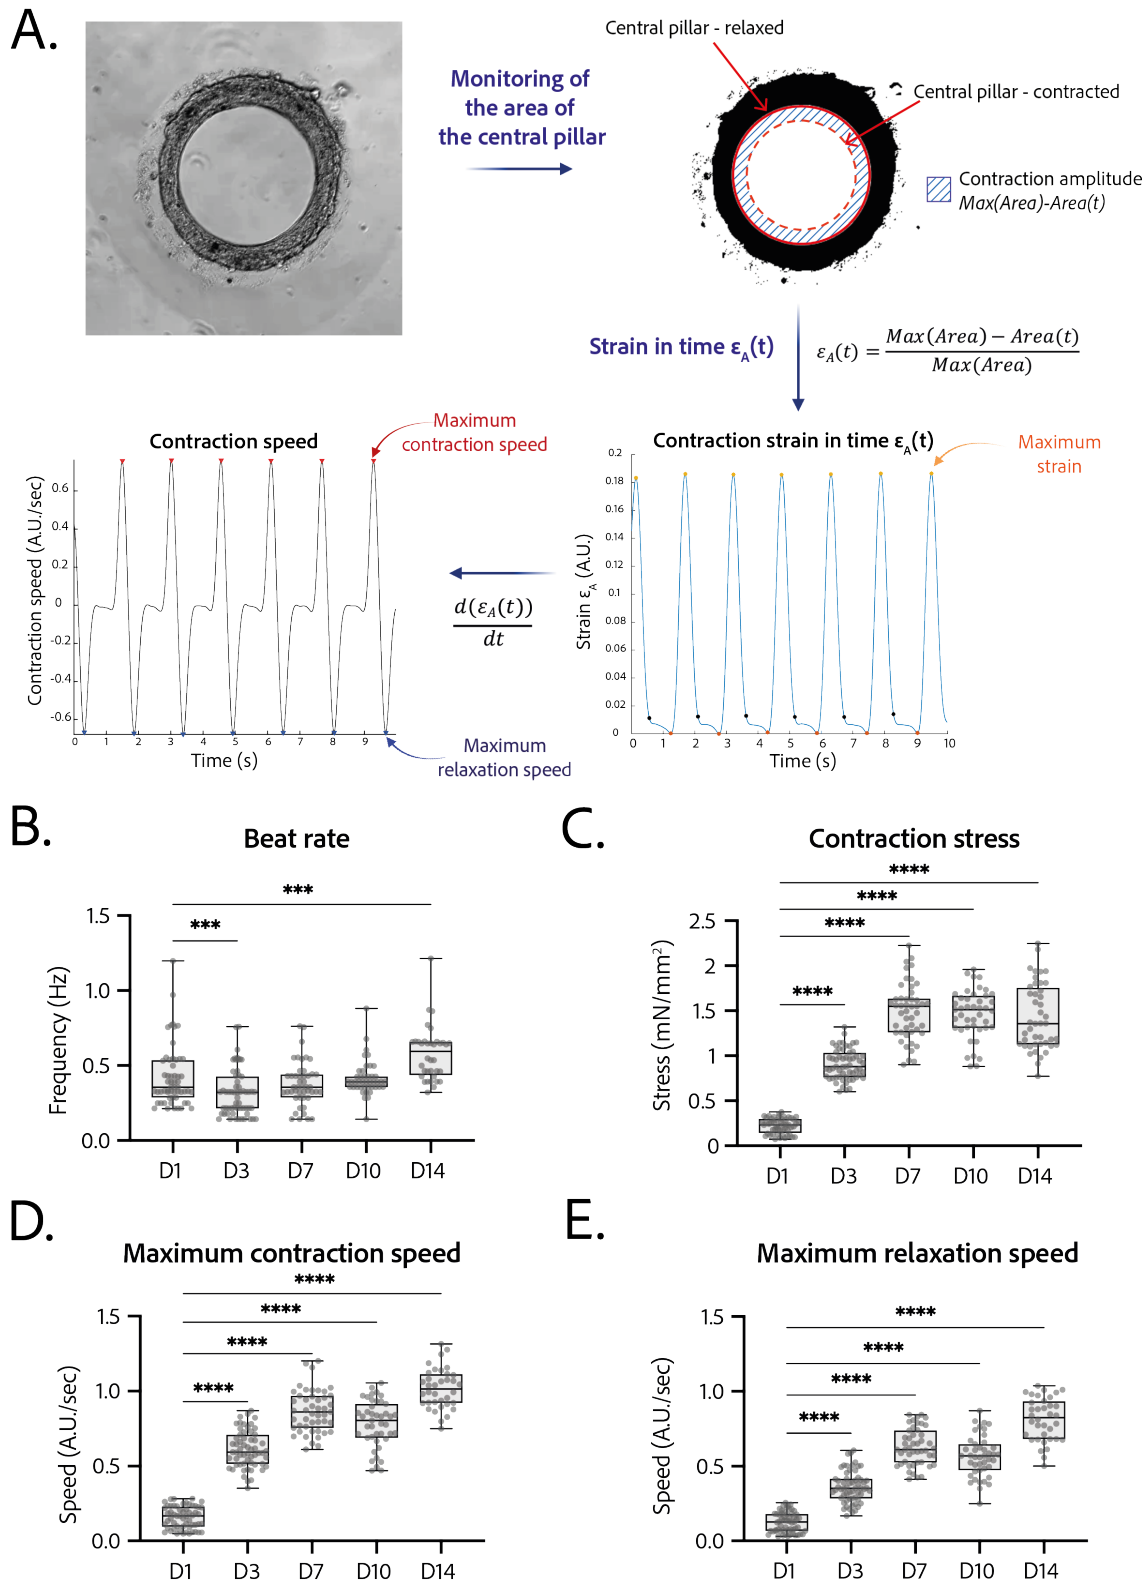

**Figure 3. A.** Principle of the in-house Matlab code used for contractility analysis: detection of the central pillar and monitoring of the evolution of its area in time, calculation and plot of the strain  $\epsilon_A$  in time (ratio between the contraction amplitude in time and the maximum area of the central pillar) – Representative plots of the strain in time and its derivative in time, for a tissue at day 14. **B. to E.** Evolution of beating parameters through time after seeding at days 1, 3, 7, 10 and 14. The changes of all the parameters through time are significant ( $p < 0.0001$  - ANOVA for repeated measures - D1:  $n = 57$ , D3:  $n = 59$ , D7:  $n = 47$ , D10:  $n = 43$ , D14:  $n = 36$  tissues, from 3 differentiations). Beating parameters at each time point are compared to their value at day 1. **B.** Evolution of beat rate through time after seeding (\*\*\*:  $p < 0.002$ ). **C.** Evolution of contraction stress through time after seeding (\*\*\*\*:  $p < 0.0001$ ). **D.** Evolution of maximum contraction speed through time after seeding (\*\*\*\*:  $p < 0.0001$ ). **E.** Evolution of maximum relaxation speed through time after seeding (\*\*\*\*:  $p < 0.0001$ ).

**Figure 3—figure supplement 1.** Strain  $\epsilon_A$  developed by the rings at D14.

**Figure 3—video 1.** Contractility of a ring at day 14.

141 plete stop of contraction at 10 $\mu$ M, as expected (Figure 4B). The IC<sub>50</sub> was estimated to be 0.677  $\mu$ M,  
142 CI=[4.278;12.81].10<sup>7</sup> M. The dose-response to the  $\beta$ -adrenergic receptor agonist, isoproterenol was  
143 tested. We observed a trend towards increase of the contraction amplitude, as well as a significant  
144 increase in the contraction and relaxation speeds (Figure 4C), without change in the beat rate. The  
145 changes in the contraction stress and the contraction and relaxation speeds with isoproterenol  
146 concentration are significant ( $p=0.0004$  for the contraction stress;  $p<0.0001$  for the contraction  
147 and relaxation speeds). Finally, dofetilide, which is an inhibitor of the  $I_{Kr}$  current, was also tested  
148 at different concentrations on the cardiac rings. This drug has been shown to be pro-arrhythmic  
149 and to induce arrhythmic events such as Torsades-de-Pointes in patients. The changes in the beat  
150 rate, the contraction stress and the contraction and relaxation speeds with dofetilide concentration  
151 were found to be significant ( $p<0.0001$  for all the parameters). As shown in Figure 4D, dofetilide  
152 significantly reduced the contraction stress and speeds until the complete stop of the contraction  
153 of the cardiac tissues for a concentration of 10 nM. Arrhythmic events were noted after adding  
154 dofetilide at concentrations of 3 and 7 nM. Indeed, the Poincaré diagram for the different dofetilide  
155 concentrations (Figure 4E) shows an increase in the contraction-to-contraction intervals (equivalent  
156 to RR intervals) for some cells at 1 nM of dofetilide and an increasing number of erratic beats with  
157 increasing dofetilide concentrations.

## 158 Discussion

159 The combination of pluripotent stem cells technologies, advanced cardiomyocyte differentiation  
160 protocols and microfabrication methods have already resulted in the generation of engineered hu-  
161 man cardiac muscle tissue-constructs, with different shapes and that can reproduce some cardiac  
162 functions (*Seguret et al. (2021)*; *Cho et al. (2022)*). However, until now, approaching the complex  
163 geometry and structure of the human myocardium required complex techniques, which limits the  
164 number of tissues produced, thus hampering their application for high-throughput experiments.  
165 In this study, we aimed to address this challenge by developing a novel strategy to create ring-  
166 shaped miniature cardiac tissues around a central pillar that is made from an optically-transparent  
167 and deformable polymer. Our main findings are as follows : (1) this novel strategy enables the  
168 fast and reproducible formation of an important number of cardiac tissues (up to 21 per well in  
169 a 96-well format) with a limited number of hiPSC-cardiomyocytes (112,500 per well); (2) In this  
170 assay, fibroblasts are essential to generate and maintain the tissue structure, with a 3:1 hiPSC-  
171 CMs:fibroblast ratio providing with the best yield of tissue generation; (3) The self-organized ring-  
172 shaped cardiac tissues contract and deform the optically-transparent central pillar, which can be  
173 recorded and analyzed to estimate the contractile force developed by the tissue; (4) these EHTs  
174 display concordant responses to positive or negative inotropes, and to arrhythmogenic drugs, as  
175 required for drug testing applications.

176 The miniaturized cardiac constructs develop by self-organization of the hiPSC-derived cardiomy-  
177 ocytes and fibroblasts, which are guided by a specific design to acquire a ring shape. The resulting  
178 EHTs are in a convenient 96-well plate format and easy to use for a user familiar with cell biology  
179 techniques. The 96-well plate format is adaptable to many plate readers and automated platforms.  
180 In addition, the optical clarity of the gels and the absence of gel directly under the structures en-  
181 sures optimal imaging conditions. We showed that the tissues can be fixed, stained by immunoflu-  
182 orescence and imaged in situ at high resolution. Moreover, our EHTs would also be compatible  
183 with live cell imaging experiments with fluorescent reporters, such as calcium transients studies  
184 or conduction studies by optical mapping. While imaging the fluorescent reporter, the contraction  
185 parameters could be monitored through the deformation of the pillar. The possibility to simul-  
186 taneously record two parameters represents a significant asset. The current design of our EHTs  
187 consists of up to 21 rings in a single well, thus providing many replicates within a single experi-  
188 ment, even if some of the rings fail to form due to biological variability. This high throughput can  
189 compensate for potential intra-batch effects. Moreover, the possibility to seed several wells at the  
190 same time allows to easily study several differentiations, compensating for the variability which is  
191 inherent to the differentiation of hiPSCs. The predictable circular shape of the tissues makes them  
192 easy to recognize and track using software. Coupled with the known organization of the 21 rings

## A. Extracellular calcium

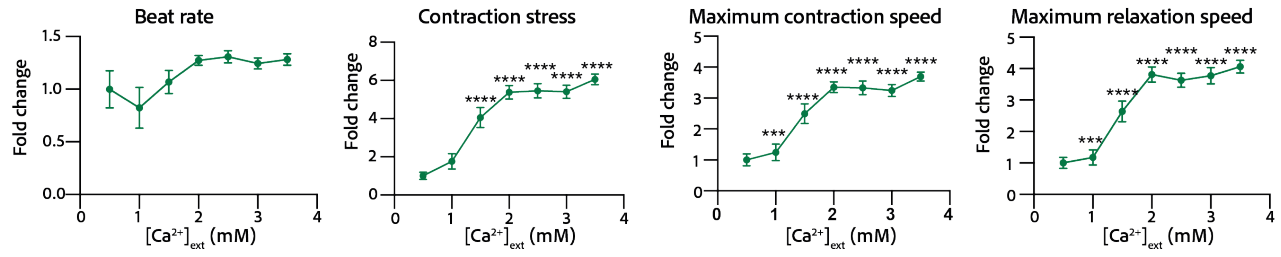

## B. Verapamil

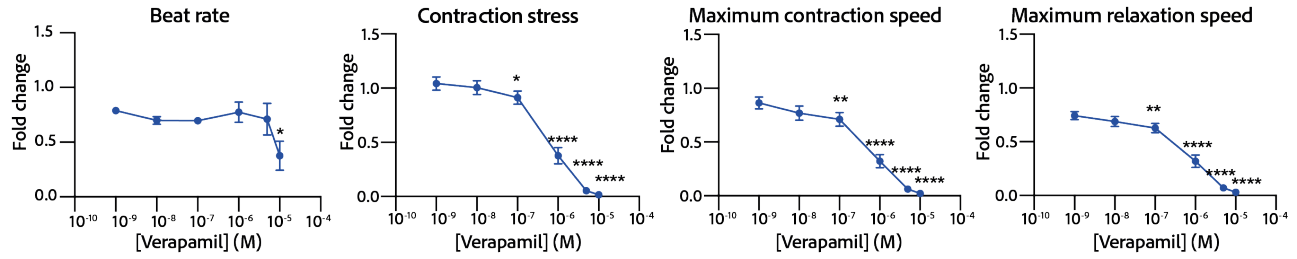

## C. Isoproterenol

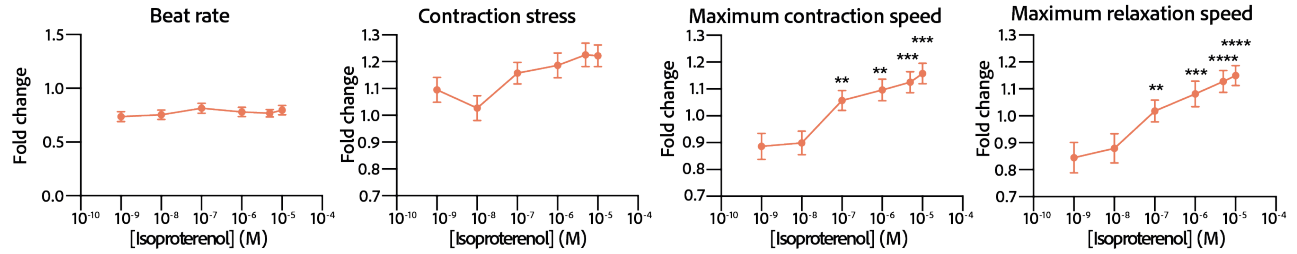

## D. Dofetilide

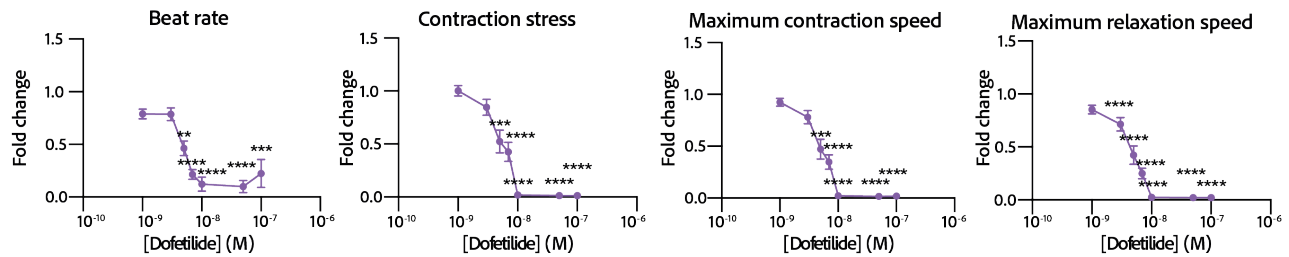

## E.

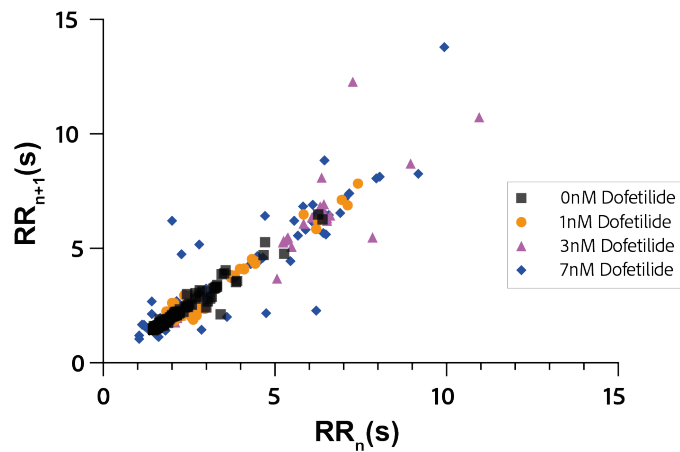

**Figure 4.** Physiological and drug testing on the cardiac tissues. Effect of the concentration in extracellular calcium (**A.**), verapamil (**B.**), isoproterenol (**C.**) or dofetilide (**D.**) on tissues contractility: beat rate, contraction stress and the maximum contraction and relaxation speeds. These parameters are expressed as a ratio between their value for each concentration and the value at basal state ( $[Ca^{2+}]_{ext}=0.5$  mM for calcium test and  $[Drug]=0M$  for drug testing). An ANOVA for repeated measures was carried out for each parameter. For each test, the value of each parameter at each concentration is compared to its value at the minimal concentration of the drug (respectively  $[Ca^{2+}]_{ext}=0.5$  mM,  $[Verapamil]=10^{-9}$  M,  $[Isoproterenol]=10^{-9}$  M and  $[Dofetilide]=10^{-9}$  M). **E.** Poincaré plot for 0 nM, 1 nM, 3 nM and 7 nM of dofetilide. For each of 16 concentration of each drug, more than 20 tissues from 3 different concentrations could be analyzed. Data is presented as mean  $\pm$  SEM. \*:  $p < 0.05$ ; \*\*:  $p < 0.01$ ; \*\*\*:  $p < 0.001$ ; \*\*\*\*:  $p < 0.0001$ .



193 for easy automated imaging, a single well can quickly generate data on many tissues that is quickly  
194 and automatically analyzed. The EHTs we described here are thus easy to use, image, manipulate  
195 and obtain readouts from.

196 We found that the circular geometry of these self-organized cardiac tissues induces a homo-  
197 geneous distribution of the cardiomyocytes and consequently of the contraction forces around  
198 the pillar and in the tissue. Importantly, the presence of the central pillar not only allows resis-  
199 tance to be felt by the tissue, but the control of its stiffness facilitates the calculation of the force  
200 developed by the tissue. Our results showed that the tissues develop a fractional shortening (or  
201 contraction strain) of about 25%, which is close to the contraction of a human heart (*Cheng et al.*  
202 *(2010)*). The corresponding stress was 1.4 mN/mm<sup>2</sup> which is in a similar range to other previously  
203 reported tissue-engineered cardiac muscle models with hiPSC-CMs in the literature (*Seguret et al.*  
204 *(2021)*; *Turnbull et al. (2014)*; *Shadrin et al. (2017)*; *Zhao et al. (2019)*; *Ronaldson-Bouchard et al.*  
205 *(2018)*; *Goldfracht et al. (2020)*; *Li et al. (2020)*). Some studies have reported higher force values  
206 (*Ronaldson-Bouchard et al. (2018)*) but in tissues that have a much large size than the tissues pro-  
207 posed here. The force generated by the adult human heart muscle, around 44 mM/mm<sup>2</sup> for a tissue  
208 strip (*Hasenfuss et al. (1991)*), however remains significantly higher than the force developed by  
209 the currently available platforms. Few cardiac assays can precisely monitor the force exerted by the  
210 tissues. Indeed, cardiac cells seeded on micropillars (*Rodriguez et al. (2014)*) and gels containing  
211 tracking beads (*Dou et al. (2021)*; *Feyen et al. (2020)*) can provide information on local (subcellular)  
212 force exertion. The force measurements do not result from the concerted effort of an organized  
213 tissue composed of aligned cardiomyocytes, as proposed by ring-shaped tissues. Tissues attached  
214 on two posts (*Turnbull et al. (2014)*; *Mannhardt et al. (2016)*; *Abilez et al. (2018)*) can also provide  
215 some information on the force generated by a tissue but the force exertion is not radial as it is in  
216 the native heart and the presence of the posts can impact the contraction by affecting the force  
217 distribution in the tissue and creating potential edge effects in the vicinity of the posts, inducing the  
218 formation of v-necks (*Abilez et al. (2018)*). Lastly, some other ring-shaped cardiac constructs have  
219 to be transferred on posts or on a force transducer to measure their contraction force (*Goldfracht*  
220 *et al. (2020)*; *Tiburcy et al. (2017)*). Therefore, the easy *in situ* monitoring of the force generated by  
221 our ring-shaped tissues with an image analysis routine represents a significant advantage, as less  
222 manipulation improves the degree of standardization. Finally, the stiffness of the central pillar can  
223 easily be adapted to model a pathological increase or decrease of the extracellular matrix stiffness.

224 The EHTs we developed are composed of cardiomyocytes that rely on fibroblasts for their as-  
225 sembly and inter-cellular adhesion. Fibroblasts have been shown to play a prominent role in the  
226 heart as they are crucial in the constitution of the supporting extracellular matrix and contribute to  
227 cardiomyocyte electrical coupling, conduction system insulation, vascular maintenance, and stress-  
228 sensing (*Ivey and Tallquist (2016)*; *Baudino et al. (2006)*). Other studies have highlighted the im-  
229 portance of a multi-cellular approach to generate EHTs (*Giacomelli et al. (2020)*; *Saini et al. (2015)*;  
230 *Amano et al. (2016)*; *Caspi et al. (2007)*). In our system, the fibroblasts additionally play a role  
231 in providing a basement support under the cardiomyocytes, in contact with the glass support of  
232 the EHTs. Immunofluorescence imaging showed an organization of the cardiomyocytes parallel  
233 to each other, perpendicular to the direction of contraction, with an increased alignment of sar-  
234 comeres. Our EHTs mimic the composition and organization of the native myocardial tissue, even  
235 if only composed of cardiomyocytes and fibroblasts. Future experiments will determine whether  
236 other, less abundant, cell types of the native myocardium, such as endothelial or smooth muscle  
237 cells, can further improve heart tissue modeling.

238 The constructs showed a spontaneous beating in the day following seeding and this activity  
239 was maintained over several weeks thus allowing contractile measurements and pharmacologi-  
240 cal testing in the conditions of auto-pacing. As a proof-of-concept, we studied the effects of well-  
241 established negative and positive inotropes and showed the ability of our platform to reproduce  
242 the anticipated effects. We observed that our tissues presented a positive inotropic response to  
243 increasing extracellular calcium concentration with a corresponding EC<sub>50</sub> which is in agreement  
244 with the values reported in the literature for engineered heart tissues made of hiPSC-CM, which  
245 are between 0.4 and 1.8mM for the EC<sub>50</sub> (*Feric and Radisic (2016)*; *Schaaf et al. (2011)*; *Streckfuss-*

246 **Bömeke et al. (2013); Mannhardt et al. (2016); Turnbull et al. (2014); Goldfracht et al. (2020)**). The  
247 negative inotropic response to increasing concentrations of verapamil of our constructs was also  
248 described in the literature and our  $IC_{50}$  value is also in the range of reported values in other EHTs:  
249 Turnbull et al. **Turnbull et al. (2014)** found  $IC_{50}=0.61 \mu\text{M}$  and other papers range from  $0.3 \mu\text{M}$  to  
250  $0.6 \mu\text{M}$  (**Mannhardt et al. (2016); Thavandiran (2019)**). The  $\beta$ -adrenergic stimulation of the tissues  
251 with increasing concentrations of isoproterenol-induced a trend towards increase in the contrac-  
252 tion force and significantly increased contraction and relaxation speeds without change in the beat  
253 rate. This is in line with what has been shown by **Goldfracht et al. (2020)** and **Zhao et al. (2019)**.  
254 Last, applying increasing dofetilide concentrations on our constructs showed a decrease in the  
255 contraction amplitude and contraction and relaxation speeds. This is in line with the literature as  
256 Zhao et al. **Zhao et al. (2019)** depicted a significant reduction of the action potential amplitude of  
257 the tissues above a concentration of dofetilide of  $10 \text{ nM}$ . By assessing the beating regularity by  
258 plotting each period as a function of the previous one, we highlighted an increasing number of  
259 erratic beats with the increase in dofetilide concentration. Other papers have also underlined the  
260 pro-arrhythmic effect of dofetilide on cardiomyocytes derived from iPSCs (**Goldfracht et al. (2019);**  
261 **Patel et al. (2019); Altrocchi et al. (2020); Blinova et al. (2017)**). Therefore, we demonstrated that  
262 our platform recapitulated the expected cardiac responses to several inotropes and arrhythmo-  
263 genic drugs.

264 While representing a significant improvement, our platform presents some limitations. First,  
265 the size of the rings is very small compared to native tissue ( $400 \mu\text{m}$ ). This size limitation is neces-  
266 sary for the purposes of high throughput screening, but for applications requiring larger tissues,  
267 wider rings can be considered in the future. Second, all measurements were performed under  
268 spontaneous pacing as a specific technique should be developed to allow external pacing of the  
269 tissues in the 96-well format. This includes electrical field stimulation or an optogenetics system  
270 with light stimulation. The precise and regular organization of the rings in the well makes this  
271 design very amenable to the introduction of microelectrodes for pacing, which could also allow  
272 the measurement of the action potentials of individual micro-tissues. Nevertheless, our main re-  
273 sults show that pharmacological responses, including the detection of the pro-arrhythmogenic  
274 effects of dofetilide, were correctly measured under spontaneous beating conditions. Third, the  
275 miniaturized format of our platform creates some limitations and challenges regarding some ex-  
276 periments, including tissue stretching. Therefore, the length-tension relationships (Franck-Starling  
277 mechanism) were not determined in our tissues.

278 Overall the novel platform we describe here is a versatile, easy-to-use and high-throughput  
279 tool to generate cardiac rings in a reproducible way and analyze them *in situ*. This platform will be  
280 useful in several cardiac research fields, including disease modeling and pharmacological testing.

## 281 **Methods and Materials**

### 282 **Mold design and characterization**

283 Micromachined stainless steel molds were obtained from high resolution CNC machining accord-  
284 ing to our CAD designs. The designs consisted of a mold that would be slightly smaller than the  
285 footprint of a well of a 96-well plate, composed of 21 structures (see Figure 1A). To check the shape  
286 of the interior cavities of the mold, a cast of the mold was created out of polydimethylsiloxane  
287 (PDMS) (Sylgard 184, Samaro), according to manufacturer's instructions.

### 288 **3D hydrogel substrate preparation**

289 A solution of 5% w/w photopolymerizable polyethylene glycol (PEG) was prepared in distilled water.  
290 Circular coverslips ( $16 \text{ mm}$ , Paul Marienfeld GmbH, Germany) were silanized to ensure adequate  
291 bonding between the PEG and glass. A drop of  $10\text{-}15 \mu\text{L}$  of gel was placed on the stainless steel  
292 mold, which was then placed in contact with a silanized coverslip. The gel solution was briefly  
293 exposed to light of the appropriate wavelength to polymerize the hydrogel. The resulting 3D struc-  
294 tured hydrogel, bound to the coverslip, was unmolded and immediately placed in distilled water.  
295 The hydrogel was rinsed at least three times with distilled water and incubated in water overnight.  
296 For cell experiments, the coverslip coated in a 3D hydrogel was briefly dried and attached to a

297 commercial black polystyrene 96-well plate with an adhesive backing (Grace Bio-labs, USA). The  
298 resulting well was filled with distilled water. Prior cell seeding, the plate was sterilized by UV irradi-  
299 ation for at least 20 minutes.

### 300 **Young's modulus measurements of the molds**

301 The PEG-based hydrogel solutions were prepared and 100 $\mu$ L of solution was deposited into a ring-  
302 shaped mold with an inner diameter of 1cm positioned on a 16mm glass coverslip. The solution  
303 was polymerized using 365nm UV light for 1 minute at a power of 70 mW/cm<sup>2</sup>, after which the  
304 mold was removed. The coverslip containing the gel was then transferred to the microscope (Leica  
305 camera AG, Germany). A hollow glass capillary with an inner diameter 0.75mm (World Precision  
306 Instruments, USA) was attached to a platform movable in the xy-plane which was used to position  
307 the capillary right next to the edge of the circular polymerized hydrogel. Once the capillary and the  
308 hydrogel made contact, a negative pressure was applied, using the Cobalt autonomous pressure  
309 pump (Elvesys, France), creating a small convexity in the surface of the hydrogel. Images of this  
310 convexity were taken (5X magnification) for a pressure ranging from -100mbar to -200mbar, with  
311 10 mbar increments (Figure 1A.). Two measurements were done on two separate gels, resulting in  
312 4 measurements per gel with 10 datapoints each. The images (and thus the size of the convexities)  
313 were analyzed using ImageJ (version 1.53c). The Young's modulus was calculated with the formula  
314  $E = \frac{p}{0.872 \frac{l}{a} + 0.748 (\frac{l}{a})^2}$  according to literature (*Gandin et al. (2021)*).

### 315 **Cardiomyocyte differentiation and culture**

316 The SKiPSC-31.3 hiPSC cell line, from a healthy control subject, has been used here and was previ-  
317 ously reported (*Galende et al. (2010)*). Induced pluripotent stem cells were seeded on Matrigel and  
318 cultivated in mTESR Plus medium (Stemcell Technologies). At 80 % confluency, cells were passaged  
319 with ReleSR reagent (StemCell Technologies). When hiPSCs reached a 90 % confluency, differenti-  
320 ation was carried out according to a protocol adapted from *Garg et al. (2018)*. Briefly, on day 0  
321 of differentiation, mTESR Plus was changed to RPMI-1640 (Life Technologies) supplemented with  
322 B27 without insulin (RPMI-B27 minus insulin) and 6  $\mu$ M CHIR-99021 (Abcam). After 48 hours, the  
323 medium was changed to RPMI-B27 minus insulin and then to RPMI-B27 minus insulin with 5 $\mu$ M  
324 IWR-1 (Sigma) for 48 hours. On day 5, the medium was replaced by RPMI-B27 minus insulin, and  
325 switched to RPMI-B27 with insulin on day 7. At day 11 a glucose starvation was carried out by  
326 replacing the medium with RPMI 1640 without glucose (Life Technologies), supplemented by B27  
327 with insulin for 3 days. Cells were then dissociated with 0.05% trypsin (Life Technologies) and re-  
328 plated in a 12-well plate at a density of 0.3  $10^6$  cells/cm<sup>2</sup> in RPMI-B27 with insulin. The following day,  
329 the medium was switched back to RPMI 1640 without glucose (Life Technologies), supplemented  
330 by B27 with insulin for 3 days again. These two rounds of glucose starvation have been shown to  
331 increase dramatically the percentage of cardiomyocytes obtained *Sharma et al. (2015)*. After day  
332 18, the cells were cultured in RPMI-B27 with insulin and the medium was changed every two days.

### 333 **Cardiomyocyte characterization**

334 The efficiency of the differentiation was assessed by cardiac troponin T flow cytometry at D21.  
335 On day 21 of differentiation, hiPSC-CMs were dissociated by enzymatic digestion (Miltenyi Multi  
336 Tissue dissociation kit 3) and stained with the Zombie NIR™ Fixable Viability Kit (BioLegend). Then,  
337 collected cell pellets were fixed and permeabilized using Inside Stain kit (Miltenyi Biotech, 130-  
338 090-477) at room temperature for 10 minutes. Cells were incubated with either APC anti-cardiac  
339 troponin T (CTNT) antibody (Miltenyi Biotech; 130-106-689 1:100) or APC isotype control (Miltenyi  
340 Biotech, 130-104-615 1:100) for 10 min at room temperature. Cells were analyzed using the BD  
341 Biosciences FACS LSR Fortessa X-20 instrument with at least 30,000 cells. Results were processed  
342 using FlowJo v10 (FlowJo, LLC).

### 343 **Human fibroblasts culture**

344 Commercially available normal adult human dermal fibroblasts (NHDF-Ad Lonza CC-2511, Lot 545147)  
345 were used up to passage 6 to generate the tissues. They were cultured in T75 flasks, in DMEM high  
346 glucose, supplemented with 10% FBS, 1% NEAA and 1% penicillin-streptomycin.

### 347 **Tissues generation and culture**

348 The wells of the assay were first rinsed twice with PBS and incubated at 37°C in DMEM high glucose,  
349 2.3 mM CaCl<sub>2</sub>, 10%FBS, 0.1% penicillin-streptomycin. To generate the tissues, cardiomyocytes were  
350 dissociated by enzymatic digestion (Miltenyi Multi Tissue dissociation kit 3) on day 22 after differ-  
351 entiation. Fibroblasts were dissociated with TrypLE Express Enzyme (12605010 Thermofischer).  
352 Three ratios of hiPSC-CMs:fibroblasts were tested: 4:1, 3:1 and 2:1. For the following experiments  
353 the tissues are generated with a ratio of 3:1 hiPSC-CMs:fibroblasts as this ratio allowed the best  
354 preservation of tissues in time. A total of 150k cells were seeded in each well. The required num-  
355 bers of fibroblasts and cardiomyocytes were then mixed and resuspended in 200µL per well of  
356 DMEM high glucose, 2.3 mM CaCl<sub>2</sub>, 10%FBS, 0.1% penicillin-streptomycin. The plate was then in-  
357 cubated at 37°C for 5 minutes and centrifuged 3 times in “short” mode to ensure that the cells fall  
358 into the circular molds. The plate was then kept at 37°C and the medium was changed every two  
359 days.

### 360 **Tissues recording and analysis**

361 The cardiac rings were recorded for 10 seconds in brightfield imaging with a high speed CCD cam-  
362 era (PL-D672MU, Pixelink) mounted on a microscope (Primovert, Zeiss), at a 10X magnification.  
363 The videos were then analyzed with a custom Matlab script. Briefly, the area of the central pil-  
364 lar is monitored in time and allows to recover the contraction amplitude in time  $Amplitude(t) =$   
365  $Max(Area) - Area(t)$  and therefore the contraction strain in time (in terms of area)  $\epsilon_A$  calculated as  
366  $\epsilon_A(t) = (Max(Area) - Area(t)) / Max(Area)$  as well as the derivative of this strain in time.  $\epsilon_A(t)$  is linked  
367 to the linear strain  $\epsilon$  with the formula  $\epsilon = \frac{\Delta r}{r_{max}} = \frac{\epsilon_A}{1 + \sqrt{1 - \epsilon_A}}$ . As we measured the Young's Modulus of  
368 the gel, we can recover the stress developed by the cardiac rings  $\sigma = E \cdot \epsilon(t)$ . From these traces we  
369 also derive the contraction frequency by Fourier transform. It was considered that below a con-  
370 traction of 0.5 %, the signal to noise ratio was not sufficient enough to detect the contraction of the  
371 tissue and the beating frequency was therefore set to 0 Hz. Finally, the maximum contraction and  
372 relaxation speeds of the tissue were also calculated respectively from the maxima and minima of  
373 the derivative of this strain in time.

### 374 **Response to increasing extracellular calcium concentration and drug tests**

375 Tissues response to different drugs and increasing calcium concentrations was assessed after day  
376 14. For the increasing extracellular calcium concentrations, tissues were first changed to Tyrode  
377 solution 0.5 mM in calcium (NaCl 140 mM, KCl 5 mM, 10 mM Hepes, Glucose 10 mM, MgCl<sub>2</sub> 1 mM,  
378 CaCl<sub>2</sub> 0.5 mM, pH 7.4) and let to equilibrate for 30 minutes at 37°C, 5 % CO<sub>2</sub>. Calcium concentration  
379 was then increased by sequential addition of a Tyrode solution at 10mM in calcium. After each  
380 addition, the tissues were incubated for 5 minutes before recording. For drug tests, tissues were  
381 changed to Tyrode solution at 1.8mM in calcium (NaCl 14 mM, KCl 5 mM, 10 mM Hepes, Glucose 10  
382 mM, MgCl<sub>2</sub> 1 mM, CaCl<sub>2</sub> 1.8 mM, pH 7.4) and let to equilibrate for 30 minutes at 37°C, 5% CO<sub>2</sub>. To  
383 evaluate the dose-response of the cardiac rings to the different drugs (Verapamil- sigma v0100000,  
384 isoproterenol - sigma 1351005, dofetilide - sigma PZ0016), the contractility was first recorded for  
385 30 seconds in basal state and the drug was then added sequentially. Between each addition of  
386 drug, the tissues were incubated for 5 minutes at 37°C before being recorded for 30 seconds.

### 387 **Immunofluorescence staining and confocal microscopy**

388 Tissues were fixed at day 15 with 4% paraformaldehyde for 15 minutes and rinsed 3 times in PBS for  
389 5 minutes. They were then blocked and permeabilized with blocking solution(BSA 2%, Triton 0.5%)  
390 at 4°C overnight. Primary antibodies Vimentin diluted at 1:250 (MA5-11883, ThermoFischer Scien-  
391 tific) and Troponin T diluted at 1:500 (ab45932, Abcam) were added the next day and incubated at  
392 4°C overnight. Tissues were rinsed 3 times in PBS for 5 minutes and secondary antibodies (Alexa  
393 Fluor secondary antibodies, LifeTechnologies, at 1:1000) and DAPI diluted at 1:1000 were added  
394 and incubated at 4°C overnight. Immunostaining pictures were taken with a Leica SP8 confocal  
395 system.



## 396 **Statistical analysis**

397 All numerical results are expressed as mean  $\pm$  standard error mean (SEM) of three independent  
398 experiments. Differences between experimental groups were analyzed with the appropriate sta-  
399 tistical tests, specified each time. P values  $< 0.05$  were considered significant for all statistical tests.  
400 Statistical analyses were performed with GraphPad Prism software.

## 401 **Acknowledgments**

402 We thank the iPS core facility of Paris Cardiovascular Research Center for its support for cell culture.  
403 We thank Camille Knops and Yunling Xu from the Flow Cytometry and the Microscopy platforms,  
404 respectively, from Université de Paris, Paris Cardiovascular Research Center, Paris, France.  
405 Schemes were created with [BioRender.com](https://BioRender.com) (access date:10/03/2023).

## 406 **References**

- 407 **Abilez OJ**, Tzatzalos E, Yang H, Zhao MT, Jung G, Zöllner AM, Tiburcy M, Riegler J, Matsa E, Shukla P, et al. Passive  
408 stretch induces structural and functional maturation of engineered heart muscle as predicted by computa-  
409 tional modeling. *Stem cells*. 2018; 36(2):265–277.
- 410 **Altrocchi C**, de Korte T, Bernardi J, Spätjens RL, Braam SR, Heijman J, Zaza A, Volders PG. Repolarization in-  
411 stability and arrhythmia by I Kr block in single human-induced pluripotent stem cell-derived cardiomyocytes  
412 and 2D monolayers. *EP Europace*. 2020; 22(9):1431–1441.
- 413 **Amano Y**, Nishiguchi A, Matsusaki M, Iseoka H, Miyagawa S, Sawa Y, Seo M, Yamaguchi T, Akashi M. Develop-  
414 ment of vascularized iPSC derived 3D-cardiomyocyte tissues by filtration Layer-by-Layer technique and their  
415 application for pharmaceutical assays. *Acta biomaterialia*. 2016; 33:110–121.
- 416 **Baudino TA**, Carver W, Giles W, Borg TK. Cardiac fibroblasts: friend or foe? *American Journal of Physiology-  
417 Heart and Circulatory Physiology*. 2006; 291(3):H1015–H1026.
- 418 **Beauchamp P**, Jackson CB, Ozthathil LC, Agarkova I, Galindo CL, Sawyer DB, Suter TM, Zuppinger C. 3D co-culture  
419 of hiPSC-derived cardiomyocytes with cardiac fibroblasts improves tissue-like features of cardiac spheroids.  
420 *Frontiers in molecular biosciences*. 2020; 7:14.
- 421 **Beauchamp P**, Moritz W, Kelm JM, Ullrich ND, Agarkova I, Anson BD, Suter TM, Zuppinger C. Development  
422 and characterization of a scaffold-free 3D spheroid model of induced pluripotent stem cell-derived human  
423 cardiomyocytes. *Tissue Engineering Part C: Methods*. 2015; 21(8):852–861.
- 424 **Bliley JM**, Vermeer MC, Duffy RM, Batalov I, Kramer D, Tashman JW, Shiwarski DJ, Lee A, Teplenin AS, Volkens  
425 L, et al. Dynamic loading of human engineered heart tissue enhances contractile function and drives a  
426 desmosome-linked disease phenotype. *Science Translational Medicine*. 2021; 13(603):eabd1817.
- 427 **Blinova K**, Stohman J, Vicente J, Chan D, Johannesen L, Hortigon-Vinagre MP, Zamora V, Smith G, Crumb WJ,  
428 Pang L, et al. Comprehensive translational assessment of human-induced pluripotent stem cell derived  
429 cardiomyocytes for evaluating drug-induced arrhythmias. *Toxicological Sciences*. 2017; 155(1):234–247.
- 430 **Boudou T**, Legant WR, Mu A, Borochin MA, Thavandiran N, Radisic M, Zandstra PW, Epstein JA, Margulies KB,  
431 Chen CS. A microfabricated platform to measure and manipulate the mechanics of engineered cardiac  
432 microtissues. *Tissue Engineering Part A*. 2012; 18(9-10):910–919.
- 433 **Cashman TJ**, Josowitz R, Johnson BV, Gelb BD, Costa KD. Human engineered cardiac tissues created using  
434 induced pluripotent stem cells reveal functional characteristics of BRAF-mediated hypertrophic cardiomy-  
435 opathy. *PloS one*. 2016; 11(1):e0146697.
- 436 **Caspi O**, Lesman A, Basevitch Y, Gepstein A, Arbel G, Habib IHM, Gepstein L, Levenberg S. Tissue engineering of  
437 vascularized cardiac muscle from human embryonic stem cells. *Circulation research*. 2007; 100(2):263–272.
- 438 **Cheng S**, Xanthakis V, Sullivan LM, Lieb W, Massaro J, Aragam J, Benjamin EJ, Vasan RS. Correlates of echocar-  
439 diographic indices of cardiac remodeling over the adult life course: longitudinal observations from the Fram-  
440 ingham Heart Study. *Circulation*. 2010; 122(6):570–578.
- 441 **Cho S**, Discher DE, Leong KW, Vunjak-Novakovic G, Wu JC. Challenges and opportunities for the next generation  
442 of cardiovascular tissue engineering. *Nature Methods*. 2022; 19(9):1064–1071.
- 443 **Dou W**, Wang L, Malhi M, Liu H, Zhao Q, Plakhotnik J, Xu Z, Huang Z, Simmons CA, Maynes JT, et al. A mi-  
444 crodevice platform for characterizing the effect of mechanical strain magnitudes on the maturation of iPSC-  
445 Cardiomyocytes. *Biosensors and Bioelectronics*. 2021; 175:112875.

- 446 **Eschenhagen T**, Ridders K, Weinberger F. How to repair a broken heart with pluripotent stem cell-derived  
447 cardiomyocytes. *Journal of Molecular and Cellular Cardiology*. 2022; 163:106–117.
- 448 **Feric NT**, Radisic M. Towards adult-like human engineered cardiac tissue: Maturing human pluripotent stem  
449 cell-derived cardiomyocytes in human engineered cardiac tissues. *Advanced drug delivery reviews*. 2016;  
450 96:110.
- 451 **Feyen DA**, McKeithan WL, Bruyneel AA, Spiering S, Hörmann L, Ulmer B, Zhang H, Briganti F, Schweizer M, Hegyi  
452 B, et al. Metabolic maturation media improve physiological function of human iPSC-derived cardiomyocytes.  
453 *Cell reports*. 2020; 32(3):107925.
- 454 **Filippo Buono M**, von Boehmer L, Strang J, P Hoerstrup S, Y Emmert M, Nugraha B. Human cardiac organoids  
455 for modeling genetic cardiomyopathy. *Cells*. 2020; 9(7):1733.
- 456 **Galende E**, Karakikes I, Edelmann L, Desnick RJ, Kerenyi T, Khoueiry G, Lafferty J, McGinn JT, Brodman M, Fuster  
457 V, et al., Amniotic fluid cells are more efficiently reprogrammed to pluripotency than adult cells. *Mary Ann  
458 Liebert, Inc. 140 Huguenot Street, 3rd Floor New Rochelle, NY 10801 USA; 2010.*
- 459 **Gandin A**, Murugesan Y, Torresan V, Ulliana L, Citron A, Contessotto P, Battilana G, Panciera T, Ventre M, Netti  
460 AP, et al. Simple yet effective methods to probe hydrogel stiffness for mechanobiology. *Scientific reports*.  
461 2021; 11(1):1–17.
- 462 **Garg P**, Oikonomopoulos A, Chen H, Li Y, Lam CK, Sallam K, Perez M, Lux RL, Sanguinetti MC, Wu JC. Genome  
463 editing of induced pluripotent stem cells to decipher cardiac channelopathy variant. *Journal of the American  
464 College of Cardiology*. 2018; 72(1):62–75.
- 465 **Gershlak JR**, Resnikoff JI, Sullivan KE, Williams C, Wang RM, Black III LD. Mesenchymal stem cells ability to  
466 generate traction stress in response to substrate stiffness is modulated by the changing extracellular matrix  
467 composition of the heart during development. *Biochemical and biophysical research communications*. 2013;  
468 439(2):161–166.
- 469 **Giacomelli E**, Meraviglia V, Camprostrini G, Cochrane A, Cao X, Van Helden RW, Garcia AK, Mircea M, Kostidis  
470 S, Davis RP, et al. Human-iPSC-derived cardiac stromal cells enhance maturation in 3D cardiac microtissues  
471 and reveal non-cardiomyocyte contributions to heart disease. *Cell stem cell*. 2020; 26(6):862–879.
- 472 **Goldfracht I**, Efraim Y, Shinnawi R, Kovalev E, Huber I, Gepstein A, Arbel G, Shaheen N, Tiburcy M, Zimmermann  
473 WH, et al. Engineered heart tissue models from hiPSC-derived cardiomyocytes and cardiac ECM for disease  
474 modeling and drug testing applications. *Acta biomaterialia*. 2019; 92:145–159.
- 475 **Goldfracht I**, Protze S, Shiti A, Setter N, Gruber A, Shaheen N, Nartiss Y, Keller G, Gepstein L. Generating  
476 ring-shaped engineered heart tissues from ventricular and atrial human pluripotent stem cell-derived car-  
477 diomyocytes. *Nature communications*. 2020; 11(1):1–15.
- 478 **Hansen A**, Eder A, Bönstrup M, Flato M, Mewe M, Schaaf S, Aksehirlioglu B, Schwörer A, Uebeler J, Eschenhagen  
479 T. Development of a drug screening platform based on engineered heart tissue. *Circulation research*. 2010;  
480 107(1):35–44.
- 481 **Hasenfuss G**, Mulieri LA, Blanchard EM, Holubarsch C, Leavitt B, Ittleman F, Alpert N. Energetics of isometric  
482 force development in control and volume-overload human myocardium. Comparison with animal species.  
483 *Circulation research*. 1991; 68(3):836–846.
- 484 **Hofbauer P**, Jahnle SM, Papai N, Giesshammer M, Deyett A, Schmidt C, Penc M, Tavernini K, Grdseloff  
485 N, Meledeth C, et al. Cardioids reveal self-organizing principles of human cardiogenesis. *Cell*. 2021;  
486 184(12):3299–3317.
- 487 **Ivey MJ**, Tallquist MD. Defining the cardiac fibroblast. *Circulation Journal*. 2016; p. CJ-16.
- 488 **Jabbour RJ**, Owen TJ, Pandey P, Reinsch M, Wang B, King O, Couch LS, Pantou D, Pitcher DS, Chowdhury RA,  
489 et al. In vivo grafting of large engineered heart tissue patches for cardiac repair. *JCI insight*. 2021; 6(15).
- 490 **Lee A**, Hudson A, Shiwarski D, Tashman J, Hinton T, Yerneni S, Bliley J, Campbell P, Feinberg A. 3D bioprinting  
491 of collagen to rebuild components of the human heart. *Science*. 2019; 365(6452):482–487.
- 492 **Legant WR**, Pathak A, Yang MT, Deshpande VS, McMeeking RM, Chen CS. Microfabricated tissue gauges to  
493 measure and manipulate forces from 3D microtissues. *Proceedings of the National Academy of Sciences*.  
494 2009; 106(25):10097–10102.
- 495 **Lewis-Israeli YR**, Wasserman AH, Gabalski MA, Volmert BD, Ming Y, Ball KA, Yang W, Zou J, Ni G, Pajares N,  
496 et al. Self-assembling human heart organoids for the modeling of cardiac development and congenital heart  
497 disease. *Nature communications*. 2021; 12(1):1–16.

- 498 **Li J**, Zhang L, Yu L, Minami I, Miyagawa S, Hörning M, Dong J, Qiao J, Qu X, Hua Y, et al. Circulating re-entrant  
499 waves promote maturation of hiPSC-derived cardiomyocytes in self-organized tissue ring. *Communications*  
500 *biology*. 2020; 3(1):1–12.
- 501 **Li RA**, Keung W, Cashman TJ, Backeris PC, Johnson BV, Bardot ES, Wong AO, Chan PK, Chan CW, Costa KD. Bio-  
502 engineering an electro-mechanically functional miniature ventricular heart chamber from human pluripo-  
503 tent stem cells. *Biomaterials*. 2018; 163:116–127.
- 504 **MacQueen LA**, Sheehy SP, Chantre CO, Zimmerman JF, Pasqualini FS, Liu X, Goss JA, Campbell PH, Gonzalez  
505 GM, Park SJ, et al. A tissue-engineered scale model of the heart ventricle. *Nature biomedical engineering*.  
506 2018; 2(12):930–941.
- 507 **Madonna R**, Van Laake LW, Botker HE, Davidson SM, De Caterina R, Engel FB, Eschenhagen T, Fernandez-Aviles  
508 F, Hausenloy DJ, Hulot JS, Lecour S, Leor J, Menasché P, Pesce M, Perrino C, Prunier F, Van Linthout S, Ytrehus  
509 K, Zimmermann WH, Ferdinandy P, et al. ESC Working Group on Cellular Biology of the Heart: position  
510 paper for Cardiovascular Research: tissue engineering strategies combined with cell therapies for cardiac  
511 repair in ischaemic heart disease and heart failure. *Cardiovascular Research*. 2019 01; 115(3):488–500. <https://doi.org/10.1093/cvr/cvz010>, doi: 10.1093/cvr/cvz010.
- 512
- 513 **Mannhardt I**, Breckwoldt K, Letuffe-Brenière D, Schaaf S, Schulz H, Neuber C, Benzin A, Werner T, Eder A,  
514 Schulze T, et al. Human engineered heart tissue: analysis of contractile force. *Stem cell reports*. 2016;  
515 7(1):29–42.
- 516 **Mannhardt I**, Saleem U, Mosqueira D, Loos MF, Ulmer BM, Lemoine MD, Larsson C, Amèen C, de Korte T,  
517 Vlaming ML, et al. Comparison of 10 control hPSC lines for drug screening in an engineered heart tissue  
518 format. *Stem cell reports*. 2020; 15(4):983–998.
- 519 **Nunes SS**, Miklas JW, Liu J, Aschar-Sobbi R, Xiao Y, Zhang B, Jiang J, Massé S, Gagliardi M, Hsieh A, et al. Biowire:  
520 a platform for maturation of human pluripotent stem cell-derived cardiomyocytes. *Nature methods*. 2013;  
521 10(8):781–787.
- 522 **Patel D**, Stohman J, Dang Q, Strauss DG, Blinova K. Assessment of proarrhythmic potential of drugs in op-  
523 togenetically paced induced pluripotent stem cell-derived cardiomyocytes. *Toxicological Sciences*. 2019;  
524 170(1):167–179.
- 525 **Polonchuk L**, Chabria M, Badi L, Hoflack JC, Figtree G, Davies MJ, Gentile C. Cardiac spheroids as promising in  
526 vitro models to study the human heart microenvironment. *Scientific reports*. 2017; 7(1):1–12.
- 527 **Richards DJ**, Li Y, Kerr CM, Yao J, Beeson GC, Coyle RC, Chen X, Jia J, Damon B, Wilson R, et al. Human cardiac  
528 organoids for the modelling of myocardial infarction and drug cardiotoxicity. *Nature Biomedical Engineering*.  
529 2020; 4(4):446–462.
- 530 **Rodriguez ML**, Graham BT, Pabon LM, Han SJ, Murry CE, Sniadecki NJ. Measuring the contractile forces of  
531 human induced pluripotent stem cell-derived cardiomyocytes with arrays of microposts. *Journal of biome-  
532 chanical engineering*. 2014; 136(5):051005.
- 533 **Ronaldson-Bouchard K**, Ma SP, Yeager K, Chen T, Song L, Sirabella D, Morikawa K, Teles D, Yazawa M, Vunjak-  
534 Novakovic G. Advanced maturation of human cardiac tissue grown from pluripotent stem cells. *Nature*.  
535 2018; 556(7700):239–243.
- 536 **Saini H**, Navaei A, Van Putten A, Nikkhah M. 3D cardiac microtissues encapsulated with the co-culture of  
537 cardiomyocytes and cardiac fibroblasts. *Advanced healthcare materials*. 2015; 4(13):1961–1971.
- 538 **Schaaf S**, Shibamiya A, Mewe M, Eder A, Stör A, Hirt MN, Rau T, Zimmermann WH, Conradi L, Eschenhagen T,  
539 et al. Human engineered heart tissue as a versatile tool in basic research and preclinical toxicology. *PLoS*  
540 *one*. 2011; 6(10):e26397.
- 541 **Seguret M**, Vermersch E, Jouve C, Hulot JS. Cardiac Organoids to Model and Heal Heart Failure and Cardiomy-  
542 opathies. *Biomedicines*. 2021; 9(5):563.
- 543 **Shadrin IY**, Allen BW, Qian Y, Jackman CP, Carlson AL, Juhas ME, Bursac N. Cardiopatch platform enables  
544 maturation and scale-up of human pluripotent stem cell-derived engineered heart tissues. *Nature commu-  
545 nications*. 2017; 8(1):1–15.
- 546 **Sharma A**, Li G, Rajarajan K, Hamaguchi R, Burrige PW, Wu SM. Derivation of highly purified cardiomyocytes  
547 from human induced pluripotent stem cells using small molecule-modulated differentiation and subsequent  
548 glucose starvation. *JoVE (Journal of Visualized Experiments)*. 2015; (97):e52628.
- 549 **Stilitano F**, Turnbull IC, Karakikes I, Nonnenmacher M, Backeris P, Hulot JS, Kranias EG, Hajjar RJ, Costa KD. Ge-  
550 nomic correction of familial cardiomyopathy in human engineered cardiac tissues. *European heart journal*.  
551 2016; 37(43):3282–3284.

- 552 **Streckfuss-Bömeke K**, Wolf F, Azizian A, Stauske M, Tiburcy M, Wagner S, Hübscher D, Dressel R, Chen S, Jende  
553 J, et al. Comparative study of human-induced pluripotent stem cells derived from bone marrow cells, hair  
554 keratinocytes, and skin fibroblasts. *European heart journal*. 2013; 34(33):2618–2629.
- 555 **Thavandiran N**. Design of Human Pluripotent Stem Cell-derived Cardiac Microtissue-based Platforms for Func-  
556 tional Screening. PhD thesis, University of Toronto; 2019.
- 557 **Tiburcy M**, Hudson JE, Balfanz P, Schlick S, Meyer T, Chang Liao ML, Levent E, Raad F, Zeidler S, Wingender E,  
558 et al. Defined engineered human myocardium with advanced maturation for applications in heart failure  
559 modeling and repair. *Circulation*. 2017; 135(19):1832–1847.
- 560 **Turnbull IC**, Karakikes I, Serrao GW, Backeris P, Lee JJ, Xie C, Senyei G, Gordon RE, Li RA, Akar FG, et al. Advancing  
561 functional engineered cardiac tissues toward a preclinical model of human myocardium. *The FASEB Journal*.  
562 2014; 28(2):644–654.
- 563 **van der Velden J**, Asselbergs FW, Bakkers J, Batkai S, Bertrand L, Bezzina CR, Bot I, Brundel BJ, Carrier L,  
564 Chamuleau S, et al. Animal models and animal-free innovations for cardiovascular research: current sta-  
565 tus and routes to be explored. Consensus document of the ESC working group on myocardial function and  
566 the ESC Working Group on Cellular Biology of the Heart. *Cardiovascular research*. 2022; 118(15):3016–3051.
- 567 **Williams K**, Liang T, Massé S, Khan S, Hatkar R, Keller G, Nanthakumar K, Nunes SS. A 3-D human model of  
568 complex cardiac arrhythmias. *Acta Biomaterialia*. 2021; 132:149–161.
- 569 **Zhao Y**, Rafatian N, Feric NT, Cox BJ, Aschar-Sobbi R, Wang EY, Aggarwal P, Zhang B, Conant G, Ronaldson-  
570 Bouchard K, et al. A platform for generation of chamber-specific cardiac tissues and disease modeling. *Cell*.  
571 2019; 176(4):913–927.
- 572 **Zhuang RZ**, Lock R, Liu B, Vunjak-Novakovic G. Opportunities and challenges in cardiac tissue engineering from  
573 an analysis of two decades of advances. *Nature Biomedical Engineering*. 2022; 6(4):327–338.



A.

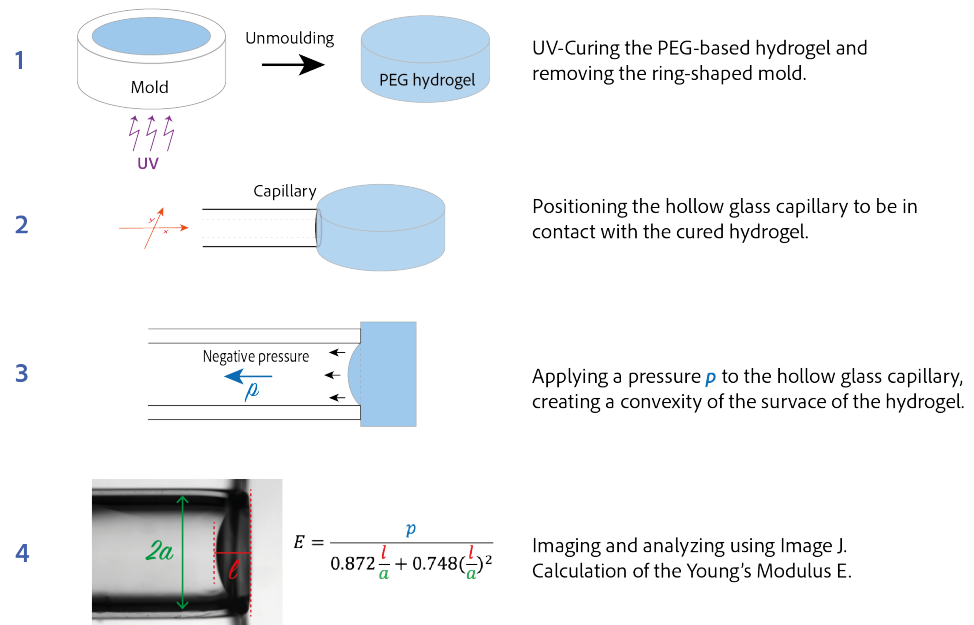

B.

### PEG gels measurements

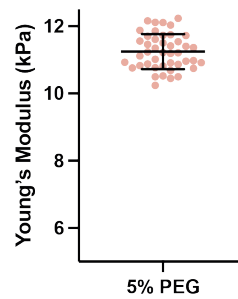

**Figure 1—figure supplement 1. A.** Procedure to measure the Young's Modulus of a PEG-gel disk by pipette aspiration. **B.** Young's modulus of 5% PEG gels (n=44).

## Quantification of differentiation efficiency

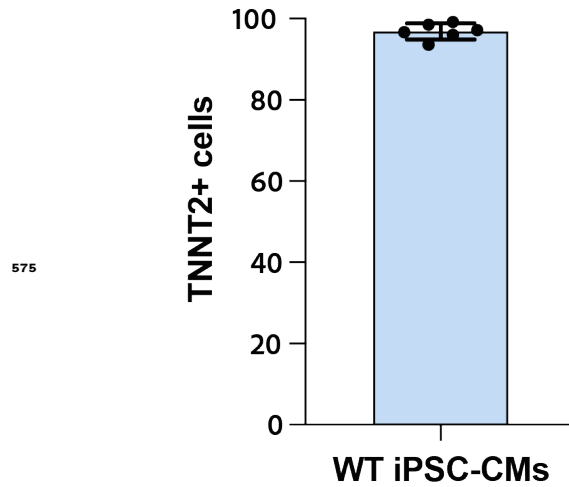

**Figure 1—figure supplement 2.** Percentage of positive cells for Troponin T2 (TNNT2) determined by flow cytometry in the 6 different differentiations of wild-type (WT) iPSCs, used for these experiments.

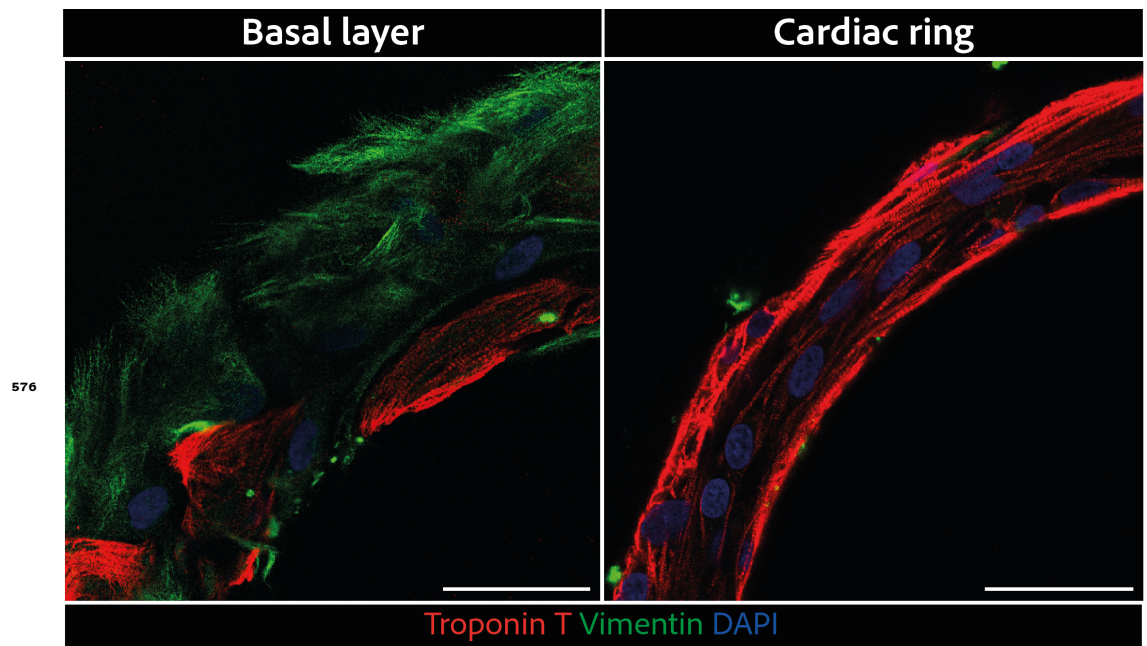

**Figure 2—figure supplement 1.** Larger scale confocal pictures of immunostained tissues at different heights basal layer(left) and cardiac ring (right) at 40X magnification: vimentin is stained in green, troponin in red, and DAPI in blue. Scale bars: 50  $\mu$ m.

## Contraction strain $\epsilon_A$

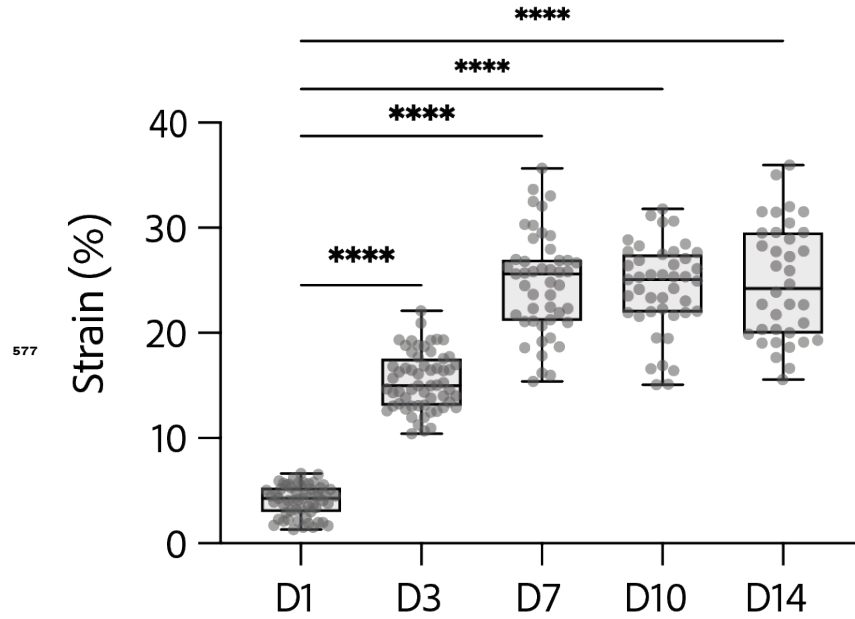

**Figure 3—figure supplement 1.** Evolution of contraction strain  $\epsilon_A$  through time after seeding at days 1, 3, 7, 10 and 14. Contraction strain changes through time are significant ( $p < 0.0001$  - ANOVA for repeated measures - D1:  $n=57$ , D3:  $n=59$ , D7:  $n=47$ , D10:  $n=43$ , D14:  $n=36$  tissues, from 3 differentiations). Contraction strain for each concentration is compared to contraction strain at day 1 (\*\*\*\*:  $p < 0.0001$ ).

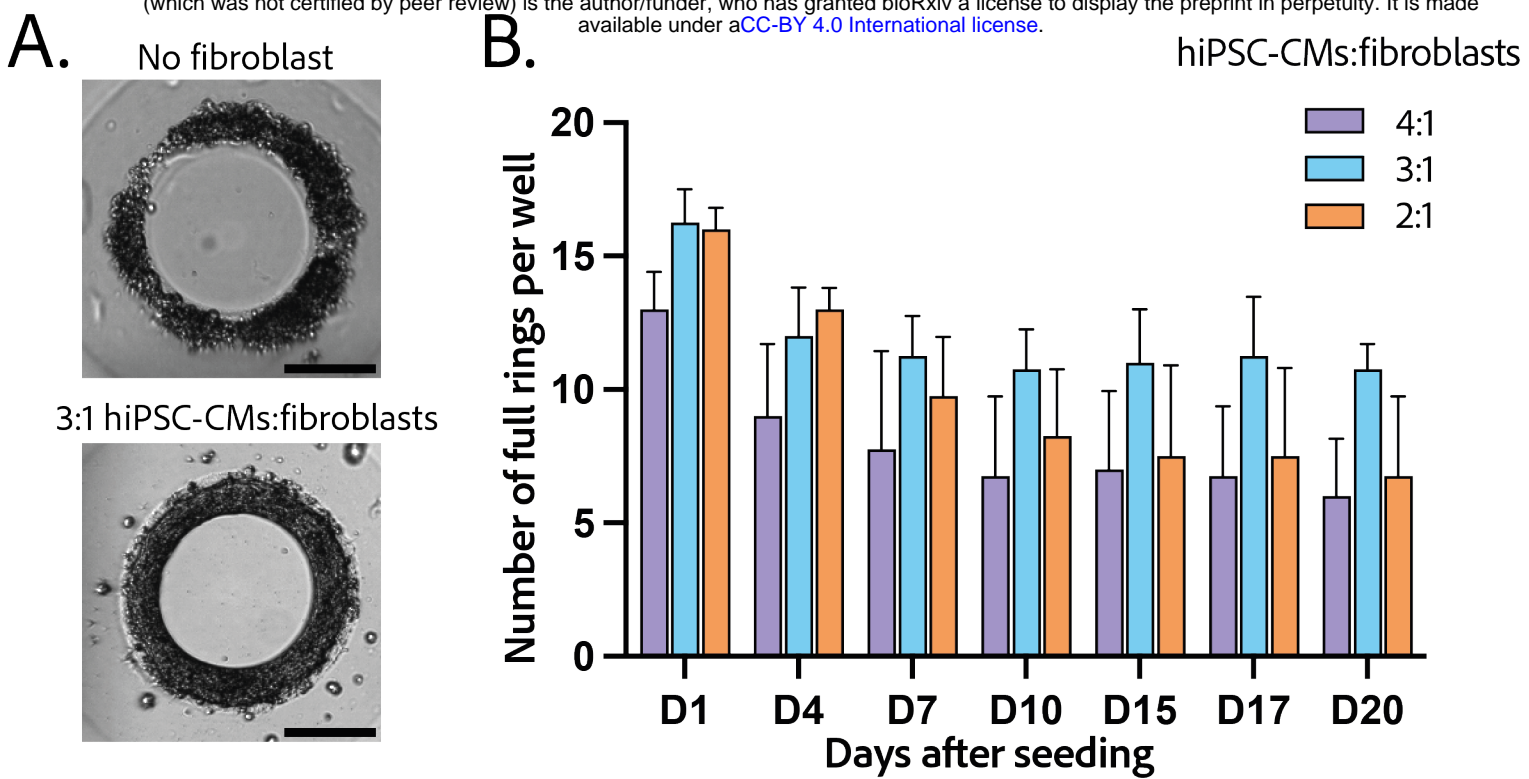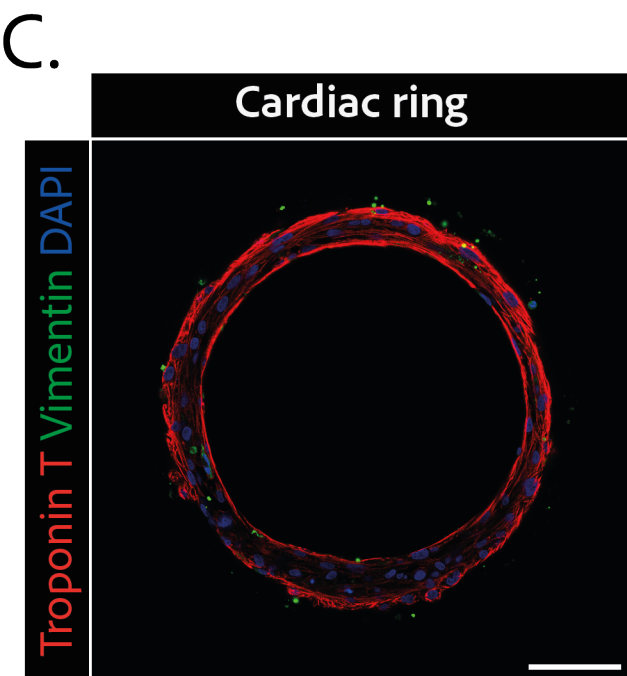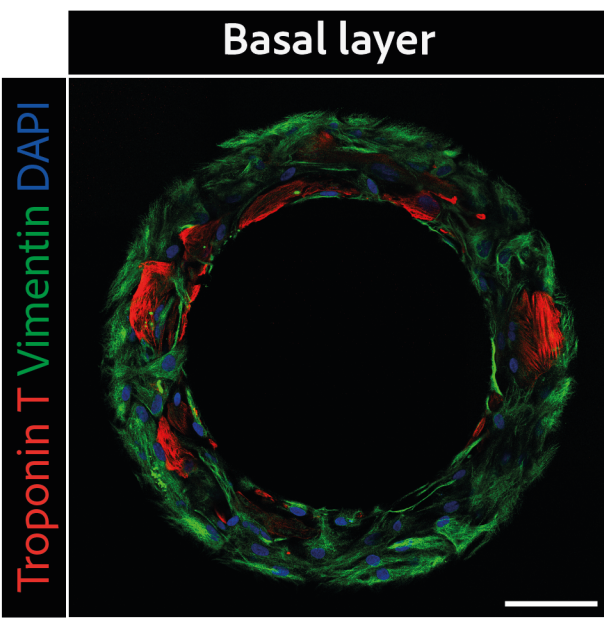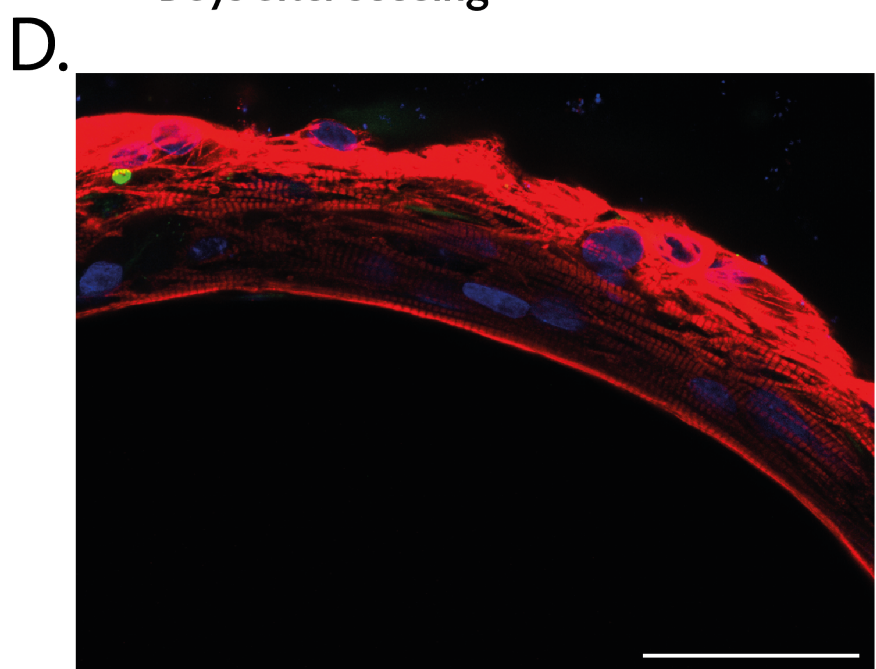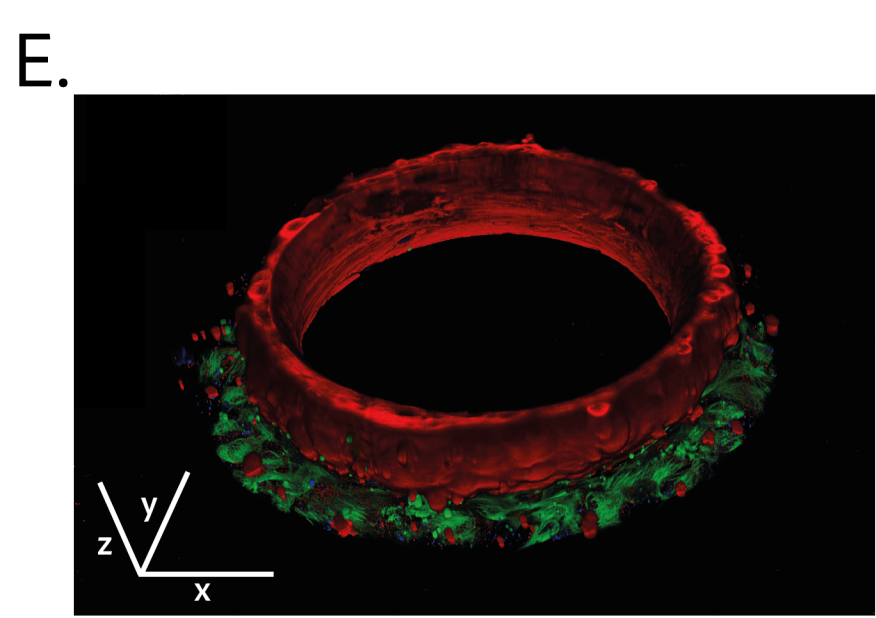



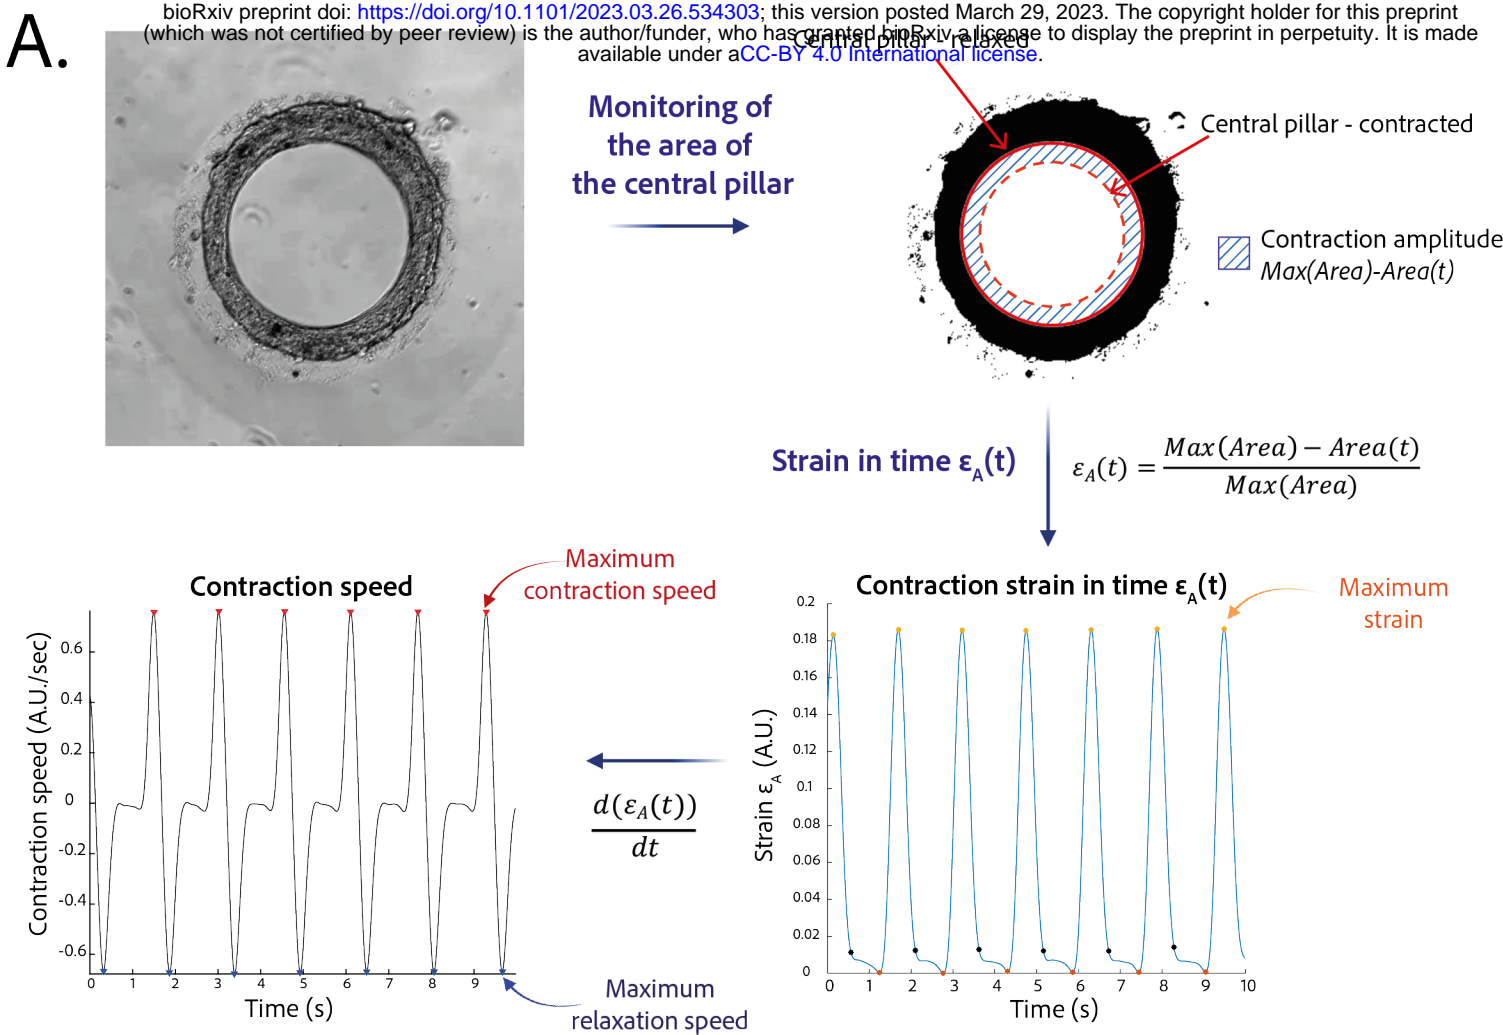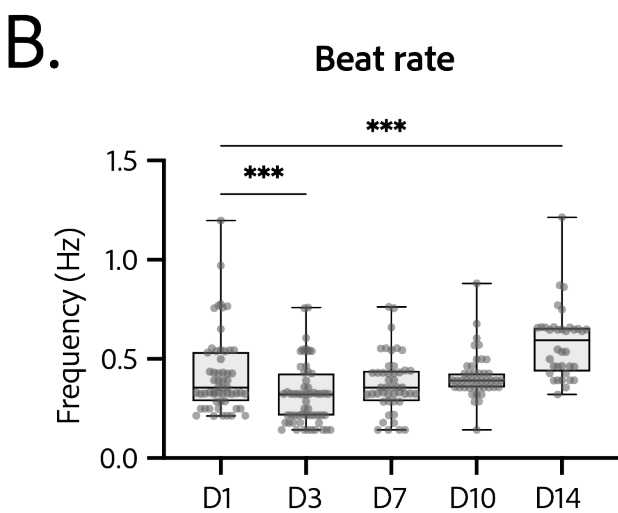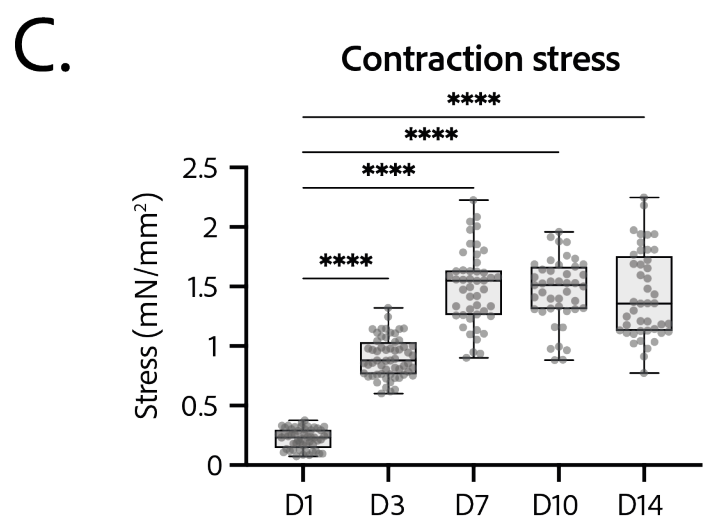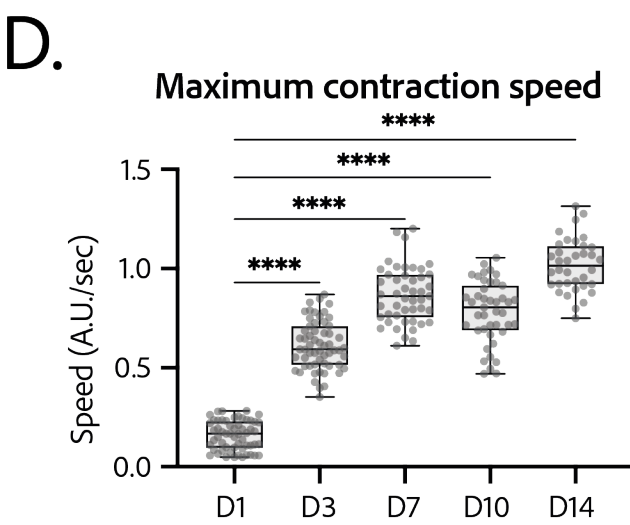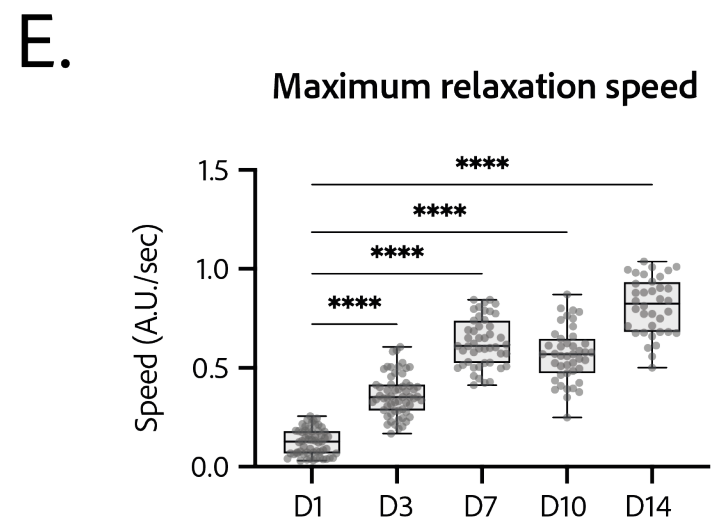

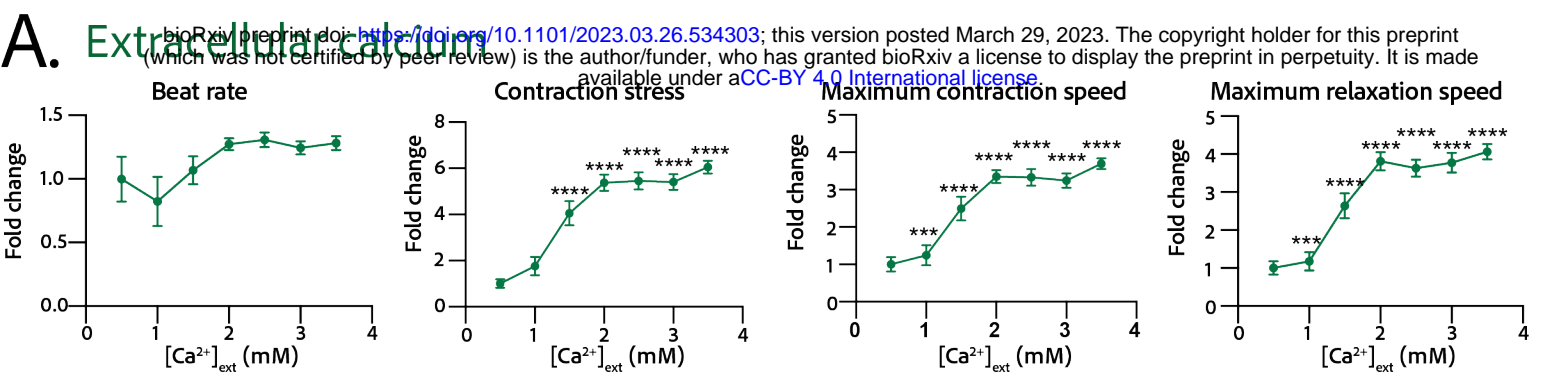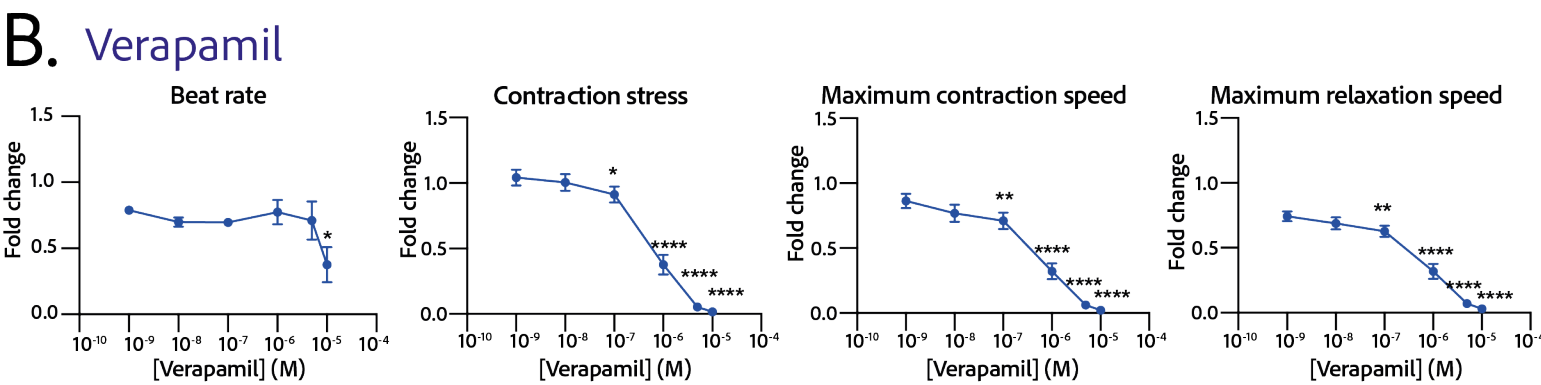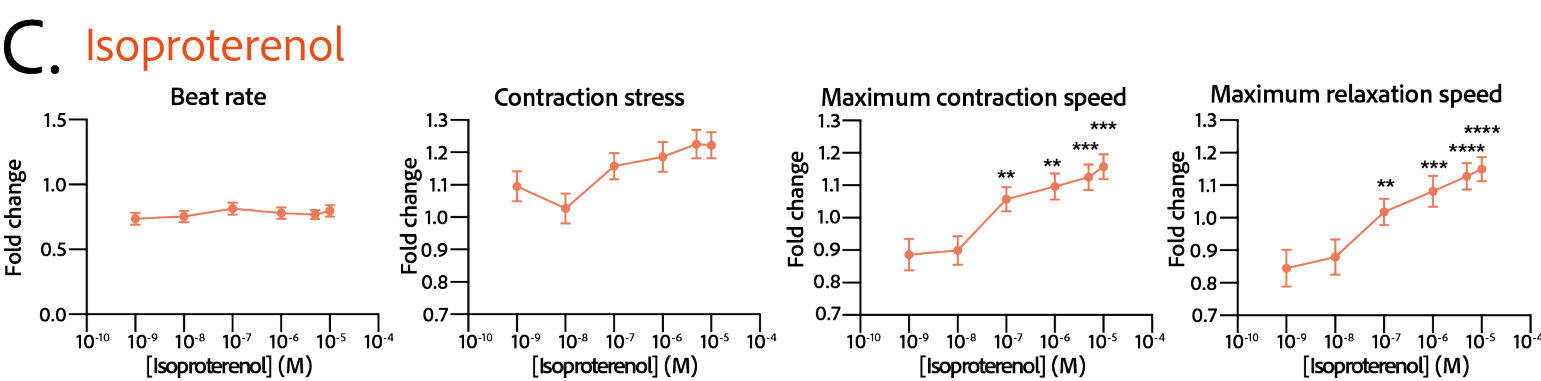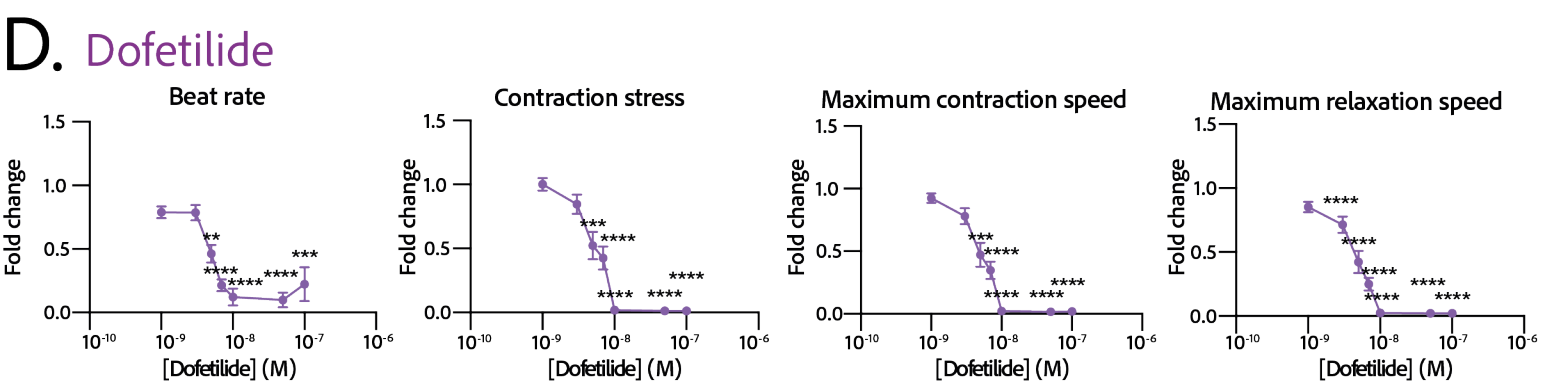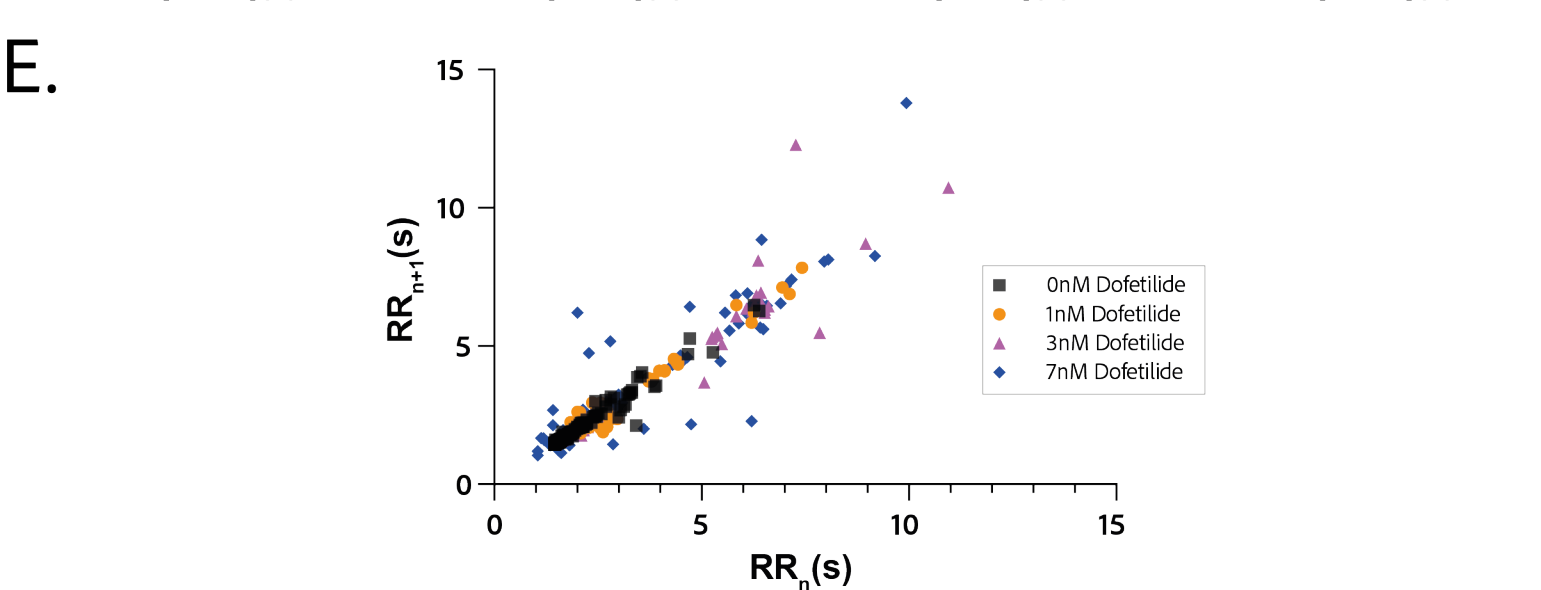

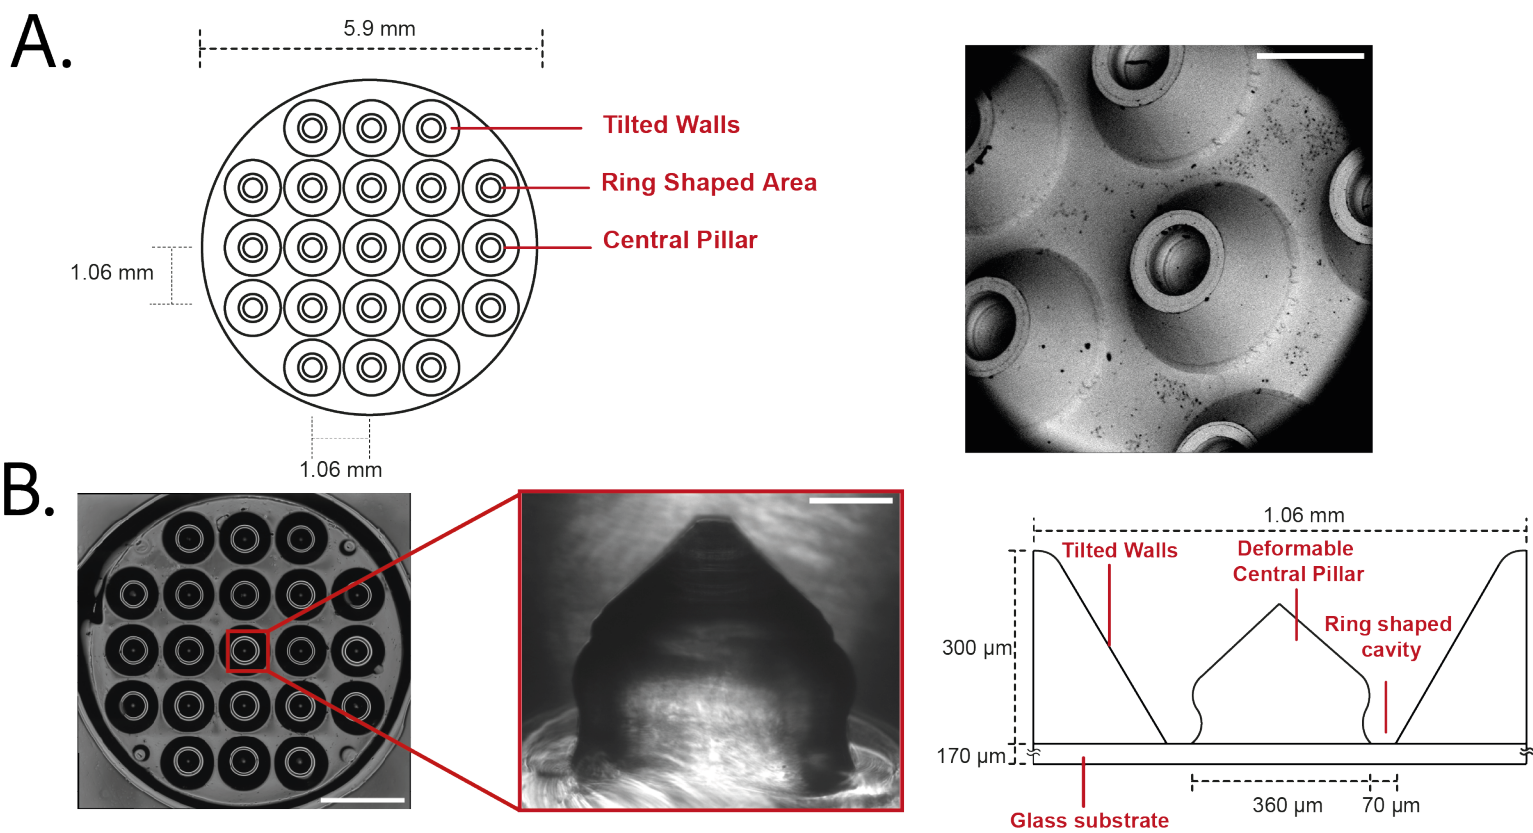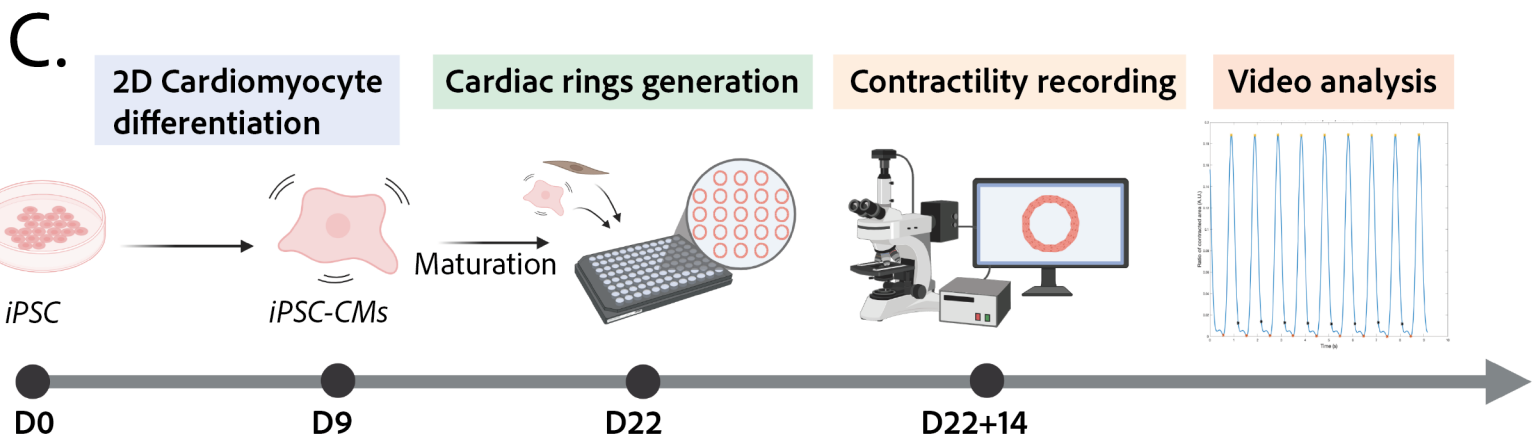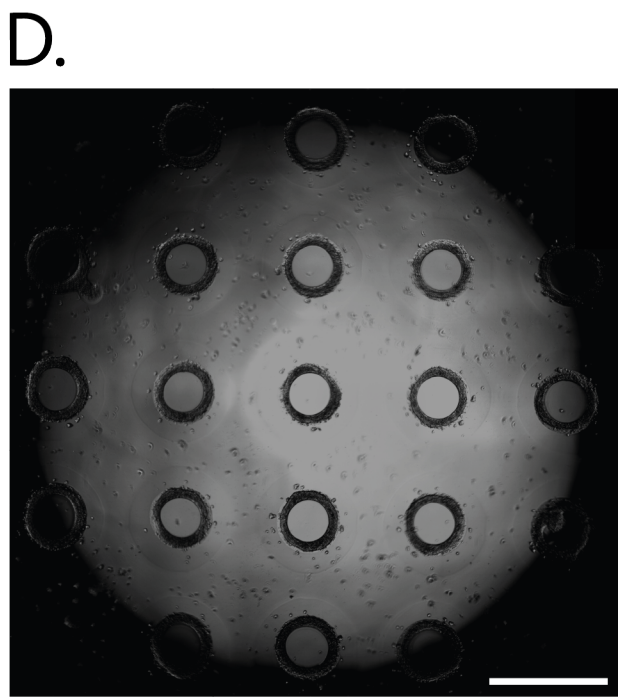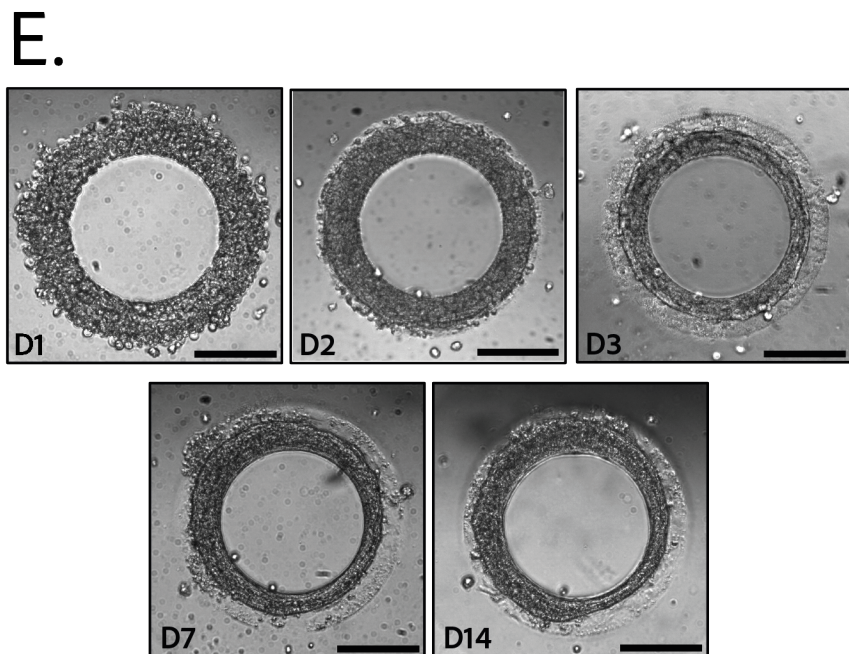

A.

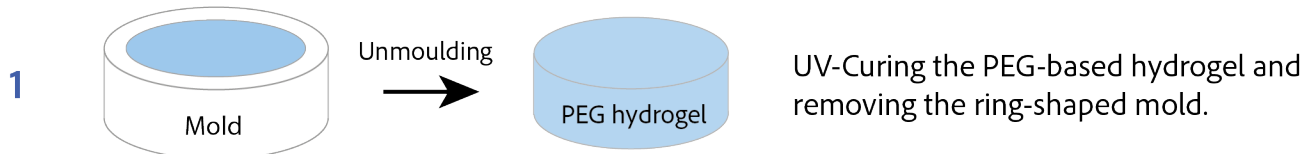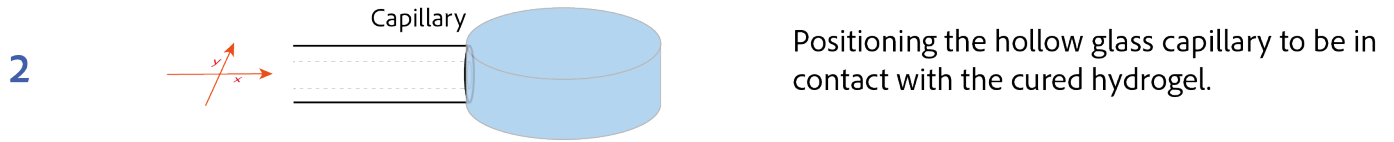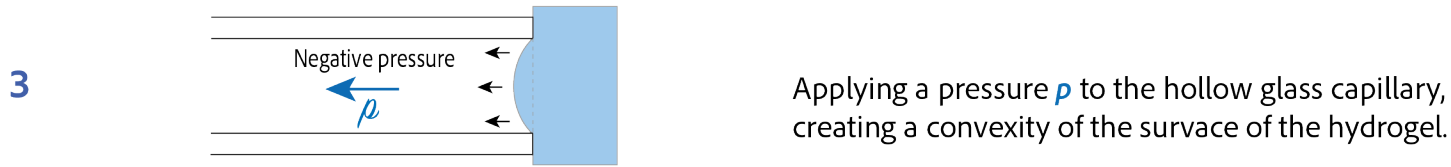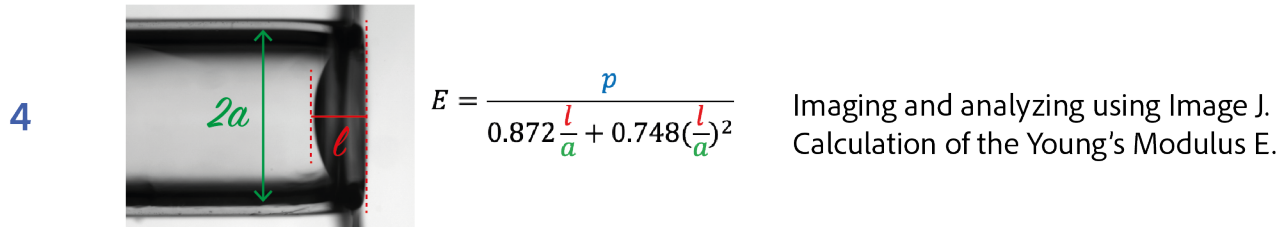

B.

### PEG gels measurements

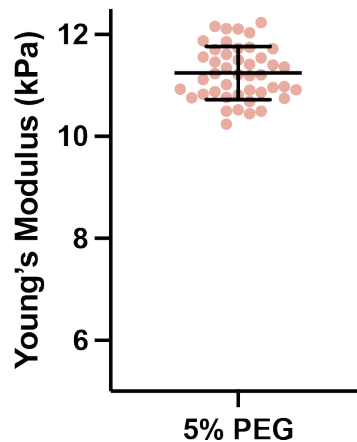

Source: https://www.biorxiv.org/content/10.1101/2023.03.26.534303v1.full.pdf
